# Supplementary material for: Efficacy of Reduced-Intensity Chemotherapy With Oxaliplatin and Capecitabine on Quality of Life and Cancer Control Among Older and Frail Patients With Advanced Gastroesophageal Cancer: The GO2 Phase 3 Randomized Clinical Trial
Source: PubMed Central journal article supplement (PMC8120440; doi:10.1001/jamaoncol.2021.0848), 2021-05-13

## Supplemental Online Content

Hall PS, Swinson D, Cairns DA, et al; GO2 Trial Investigators. Efficacy of reduced-intensity chemotherapy with oxaliplatin and capecitabine on quality of life and cancer control among older and frail patients with advanced gastroesophageal cancer: the GO2 phase 3 randomized clinical trial. *JAMA Oncol*. Published online May 13, 2021. doi:10.1001/jamaoncol.2021.0848

**eTable 1:** GO2 Study Sites and Principal Investigators

**eTable 2:** Baseline characteristics

**eTable 3:** Baseline Frailty domains

**eTable 4a:** Summaries of missing data for quality of life questionnaires in CHEMO-INTENSITY pathway

**eTable 4b:** Summaries of missing data for quality of life questionnaires in the CHEMO-BSC pathway

**eTable 5:** EORTC-QLQ-C30 Global health status in the CHEMO-INTENSITY pathway

**eTable 6:** EORTC-QLQ-C30 Functional scales in the CHEMO-INTENSITY pathway

**eTable 7:** EORTC-QLQ-C30 Symptom scales in the CHEMO-INTENSITY pathway

**eTable 8:** EORTC-QLQ-C30 Symptom scales - CHEMO-INTENSITY pathway

**eTable 9:** EORTC-QLQ-C30 Fatigue scale in the CHEMO-INTENSITY pathway

**eTable 10:** EORTC-OG-25 Symptom scales in the CHEMO-INTENSITY pathway

**eTable 11:** Summaries of best response

**eTable 12:** Factors Associated with OTU outcome

**eTable 13:** Lookup table for multivariable prognostic model

**eTable 14:** Predictive ability of the multivariable prognostic model evaluated at each variable combination

**eTable 15:** Chemotherapy delivery and tolerability (CHEMO-INTENSITY randomisation)

- eFigure 1:** Influence of baseline factors and dose level on OTU
- eFigure 2:** Univariate analysis: impact of baseline variables Overall Treatment Utility
- eFigure 3:** Univariate analysis : Impact of baseline symptoms Overall Treatment Utility
- eFigure 4:** Forest plot for CHEMO-INTENSITY PFS (Level A vs. Level B)
- eFigure 5:** Forest plot for CHEMO-INTENSITY PFS (Level A vs. Level C)
- eFigure 6:** Forest plot for CHEMO-INTENSITY OS (Level A vs. Level B)
- eFigure 7:** Forest plot for CHEMO-INTENSITY OS (Level A vs. Level C)
- eFigure 8:** EORTC-QLQ-C30 Fatigue scale in the CHEMO-INTENSITY pathway
- eFigure 9:** EuroqoL EQ-5D-3L Score in the CHEMO-INTENSITY pathway
- eFigure 10:** EORTC-QLQ-C30 Fatigue scale in the CHEMO-BSC pathway
- eFigure 11:** EuroqoL EQ-5D-3L Score in the CHEMO-BSC pathway
- eFigure 12:** Time to Deterioration of Fatigue in the CHEMO-INTENSITY Pathway
- eFigure 13:** Per Protocol Population: PFS curves by randomised treatment arm

This supplemental material has been provided by the authors to give readers additional information about their work.

## Supplementary Tables

**eTable 1 GO2 Study Sites and Principal Investigators**

| Centre                                                        | Total Recruited | CHEMO-INTENSITY Pathway | CHEMO-BSC Pathway | PI name                |
|---------------------------------------------------------------|-----------------|-------------------------|-------------------|------------------------|
| Leeds Teaching Hospitals NHS FT Trust                         | 58              | 55                      | 3                 | Dr Daniel Swinson      |
| East Kent Hospitals NHS Trust                                 | 33              | 32                      | 1                 | Dr Justin Waters       |
| Hull and East Yorkshire Hospitals NHS Trust                   | 25              | 24                      | 1                 | Dr Rajarshi Roy        |
| University Hospitals Bristol NHS Foundation Trust             | 25              | 24                      | 1                 | Dr Stephen Falk        |
| Sheffield Teaching Hospitals NHS Trust                        | 25              | 25                      | 0                 | Dr Jonathan Wadsley    |
| The Royal Wolverhampton NHS Trust                             | 23              | 23                      | 0                 | Dr Mano Joseph         |
| Mid Yorkshire Hospitals NHS Trust                             | 21              | 18                      | 3                 | Dr Kostantinos-Vellios |
| North Cumbria University Hospitals NHS Trust                  | 21              | 21                      | 0                 | Dr Jonathan Nicoll     |
| Royal United Hospital Bath NHS Trust                          | 20              | 20                      | 0                 | Dr Tania Tillett       |
| Royal Surrey County Hospital NHS Foundation Trust             | 19              | 19                      | 0                 | Dr Sebastian Cummins   |
| The Dudley Group NHS Foundation Trust                         | 18              | 16                      | 2                 | Dr Simon Grumett       |
| United Lincolnshire Hospitals NHS Trust                       | 18              | 10                      | 8                 | Dr Zuzana Stokes       |
| The Christie NHS Foundation Trust                             | 16              | 15                      | 1                 | Dr Tom Waddell         |
| The Shrewsbury and Telford Hospital NHS Trust                 | 14              | 11                      | 3                 | Dr Anirban Chatterjee  |
| Betsi Cadwaldr University LHB                                 | 13              | 13                      | 0                 | Dr Angel Garcia        |
| York Teaching Hospital NHS Foundation Trust (Scarb)           | 13              | 4                       | 9                 | Dr Mohammed Khan       |
| Guys and St Thomas's NHS Foundation Trust                     | 12              | 11                      | 1                 | Dr Nick Maisey         |
| Worcestershire Acute Hospitals NHS Trust                      | 12              | 9                       | 3                 | Dr Cheng Boon          |
| Calderdale and Huddersfield NHS Foundation Trust              | 11              | 7                       | 4                 | Dr Jo Dent             |
| Sherwood Forest NHS Foundation Trust                          | 9               | 9                       | 0                 | Dr Eleanor James       |
| NHS Tayside                                                   | 9               | 9                       | 0                 | Prof Russell Petty     |
| Bradford Teaching Hospitals NHS Foundation Trust              | 9               | 8                       | 1                 | Dr Sue Cheeseman       |
| Norfolk and Norwich University Hospitals NHS Foundation Trust | 8               | 8                       | 0                 | Dr Tom Roques          |
| Imperial College Healthcare NHS Trust                         | 8               | 8                       | 0                 | Dr Nick Reed           |
| Gloucestershire Hospitals NHS Foundation Trust                | 7               | 7                       | 0                 | Dr Charles Candish     |
| University Hospitals of Morecambe Bay NHS Foundation Trust    | 7               | 7                       | 0                 | Dr David Fyfe          |
| York Teaching Hospital NHS Foundation Trust (York)            | 7               | 6                       | 1                 | Dr Kim Last            |
| Royal Cornwall NHS Trust                                      | 7               | 7                       | 0                 | Dr Richard Ellis       |
| NHS Grampian                                                  | 7               | 7                       | 0                 | Dr Leslie Samuel       |
| Western Sussex Hospitals NHS Foundation Trust                 | 7               | 7                       | 0                 | Dr Rebecca Herbertson  |
| South Devon Healthcare NHS Trust                              | 6               | 6                       | 0                 | Dr Louise Medley       |
| Oxford University Hospitals NHS Trust                         | 6               | 6                       | 0                 | Dr Kinnari Patel       |

|                                                                       |   |   |   |                           |
|-----------------------------------------------------------------------|---|---|---|---------------------------|
| Plymouth Hospitals NHS Trust                                          | 6 | 6 | 0 | Dr David Sherriff         |
| East Sussex Healthcare NHS Trust                                      | 6 | 6 | 0 | Dr Angus Robinson         |
| Blackpool Teaching Hospitals NHS Trust                                | 5 | 5 | 0 | Dr Pavel Bezecky          |
| Betsi Cadwaldr University LHB                                         | 5 | 5 | 0 | Dr Duncan Wilkins         |
| Hinchingbrooke Health Care NHS Trust                                  | 4 | 4 | 0 | Dr Adam McGeoch           |
| Barts Health NHS Trust                                                | 4 | 4 | 0 | Dr David Propper          |
| Ysbyty Gwynedd                                                        | 4 | 3 | 1 | Dr Rachel Williams        |
| Weston Area Healthcare Trust                                          | 3 | 3 | 0 | Dr Serena Hilman          |
| Barking, Havering & Redbridge University Hospitals NHS Trust          | 3 | 3 | 0 | Dr Sherif Raouf           |
| Great Western Hospitals NHS Foundation Trust                          | 3 | 3 | 0 | Dr Claire Blesing         |
| The Royal Bournemouth and Christchurch Hospitals NHS Foundation Trust | 3 | 3 | 0 | Dr Joanne Parkinson       |
| South Tees Hospitals NHS Foundation Trust                             | 3 | 3 | 0 | Dr Nick Wadd              |
| Milton Keynes Hospital NHS Foundation Trust                           | 2 | 2 | 0 | Dr Wasiru Saka            |
| Walsall Healthcare NHS Trust                                          | 2 | 2 | 0 | Dr Victoria Kunene        |
| Abertawe Bro Morgannwg University Local Health Board                  | 2 | 2 | 0 | Dr Colin Askill           |
| Mid Cheshire Hospitals Foundation Trust                               | 2 | 1 | 1 | Dr Arshad Jamil           |
| Taunton and Somerset NHS Foundation Trust                             | 2 | 1 | 1 | Dr Emma Cattell           |
| Dorset County Hospital NHS Foundation Trust                           | 2 | 2 | 0 | Dr Lauren Gorf            |
| Hywel Dda Health Board (Bronglais)                                    | 2 | 1 | 1 | Dr Vallipuram Vigneswaran |
| Yeovil District Hospital NHS Foundation Trust                         | 1 | 1 | 0 | Dr Erica Beaumont         |
| County Durham and Darlington NHS Foundation Trust                     | 0 | 0 | 0 | Dr Syed Zubair            |
| Hywel Dda Health Board                                                | 0 | 0 | 0 | Dr Elin Jones             |
| Wye Valley NHS Trust                                                  | 0 | 0 | 0 | Dr Nick Reed              |
| Salisbury NHS F Trust                                                 | 0 | 0 | 0 | Dr Alaeldon Shablak       |
| Northern Lincolnshire and Goole NHS Foundation Trust                  | 0 | 0 | 0 | Dr Georgios Bozas         |

**eTable 2: Baseline characteristics**

Used in subgroup analysis and prognostic modelling. Frailty domains are summarised in Table S2.

|                                     | CHEMO-INTENSITY pathway |                    |                    |               | CHEMO-BSC pathway |               |
|-------------------------------------|-------------------------|--------------------|--------------------|---------------|-------------------|---------------|
|                                     | Level A<br>(n=170)      | Level B<br>(n=171) | Level C<br>(n=173) | Total (n=514) | Level C<br>(n=23) | BSC<br>(n=22) |
| <b>Age group (years)</b>            |                         |                    |                    |               |                   |               |
| <75                                 | 73 (43%)                | 73 (43%)           | 72 (42%)           | 218 (42%)     | 6 (26·1%)         | 4 (18·2%)     |
| ≥75                                 | 97 (57%)                | 98 (57%)           | 101 (58%)          | 296 (58%)     | 17 (73·9%)        | 18 (81·8%)    |
| <b>Gender</b>                       |                         |                    |                    |               |                   |               |
| Male                                | 131 (77%)               | 129 (75%)          | 125 (72%)          | 385 (75%)     | 14 (60·9%)        | 13 (59·1%)    |
| Female                              | 39 (23%)                | 42 (24%)           | 48 (28%)           | 129 (25%)     | 9 (39·1%)         | 9 (40·9%)     |
| <b>WHO PS</b>                       |                         |                    |                    |               |                   |               |
| 0-1                                 | 117 (69%)               | 116 (68%)          | 120 (70%)          | 353 (69%)     | 10 (43·5%)        | 7 (31·8%)     |
| 2                                   | 49 (29%)                | 49 (29%)           | 50 (29%)           | 148 (29%)     | 10 (43·5%)        | 13 (59·1%)    |
| >2                                  | 4 (2·4%)                | 6 (3·5%)           | 3 (1·7%)           | 13 (2·5%)     | 3 (13·0%)         | 2 (9·1%)      |
| <b>Distant metastases</b>           |                         |                    |                    |               |                   |               |
| No                                  | 55 (32%)                | 53 (31%)           | 52 (30%)           | 160 (31%)     | 11 (47·8%)        | 10 (45·5%)    |
| Yes                                 | 115 (68%)               | 118 (69%)          | 121 (70%)          | 354 (69%)     | 12 (52·2%)        | 12 (54·5%)    |
| <b>Tumour histology</b>             |                         |                    |                    |               |                   |               |
| Squamous                            | 20 (12%)                | 18 (11%)           | 20 (12%)           | 58 (11%)      | 4 (17·4%)         | 5 (22·7%)     |
| Other                               | 150 (88%)               | 153 (90%)          | 153 (88%)          | 456 (89%)     | 19 (82·6%)        | 17 (77·3%)    |
| <b>Dose reduction</b>               |                         |                    |                    |               |                   |               |
| No                                  | 159 (94%)               | 159 (93%)          | 162 (94%)          | 480 (93%)     | 23 (100·0%)       | 20 (90·9%)    |
| Yes                                 | 11 (6·5%)               | 12 (7·0%)          | 11 (6·4%)          | 34 (6·6%)     | 0 (0·0%)          | 2 (9·1%)      |
| <b>Trastuzumab</b>                  |                         |                    |                    |               |                   |               |
| No                                  | 163 (95·9%)             | 161 (94·2%)        | 163 (94·2%)        | 487 (94·7%)   | 22 (95·7%)        | 21 (95·5%)    |
| Yes                                 | 7 (4·1%)                | 10 (5·8%)          | 10 (5·8%)          | 27 (5·3%)     | 1 (4·3%)          | 1 (4·5%)      |
| <b>Site of primary tumour</b>       |                         |                    |                    |               |                   |               |
| Esophagus                           | 55 (32%)                | 73 (42%)           | 69 (40%)           | 197 (38%)     | 13 (56·5%)        | 9 (40·9%)     |
| GE junction                         | 50 (29·4%)              | 34 (20%)           | 39 (23%)           | 123 (24%)     | 4 (17·4%)         | 4 (18·2%)     |
| Gastric                             | 64 (38%)                | 64 (37%)           | 64 (37%)           | 192 (37%)     | 6 (26·1%)         | 9 (40·9%)     |
| Missing                             | 1 (0·6%)                | 0 (0·0%)           | 1 (0·6%)           | 2 (0·4%)      |                   |               |
| <b>VAS &lt;50 (EQ-5D)</b>           |                         |                    |                    |               |                   |               |
| No                                  | 143 (84·1%)             | 141 (82·5%)        | 141 (81·5%)        | 425 (82·7%)   | 17 (73·9%)        | 16 (72·7%)    |
| Yes                                 | 22 (13%)                | 26 (15%)           | 29 (17%)           | 77 (15%)      | 5 (21·7%)         | 4 (18·2%)     |
| Missing                             | 5 (2·9%)                | 4 (2·3%)           | 3 (1·7%)           | 12 (2·3%)     | 1 (4·3%)          | 2 (9·1%)      |
| <b>GHS/QoL &lt;41·6 (C-30)</b>      |                         |                    |                    |               |                   |               |
| No                                  | 128 (75·3%)             | 120 (70·2%)        | 129 (74·6%)        | 377 (73·3%)   | 13 (56·5%)        | 17 (77·3%)    |
| Yes                                 | 36 (21%)                | 50 (29%)           | 38 (22%)           | 124 (24%)     | 8 (34·8%)         | 5 (22·7%)     |
| Missing                             | 6 (3·5%)                | 1 (0·6%)           | 6 (3·5%)           | 13 (2·5%)     | 2 (8·7%)          | 0 (0·0%)      |
| <b>Pain (EQ-5D)</b>                 |                         |                    |                    |               |                   |               |
| I have no pain or discomfort        | 53 (31%)                | 43 (25%)           | 58 (34%)           | 154 (30%)     | 9 (39·1%)         | 4 (18·2%)     |
| I have moderate pain or discomfort  | 100 (58·8%)             | 114 (66·7%)        | 97 (56·1%)         | 311 (61%)     | 11 (47·8%)        | 16 (72·7%)    |
| I have extreme pain or discomfort   | 11 (6·5%)               | 7 (4·1%)           | 14 (8·1%)          | 32 (6·2%)     | 2 (8·7%)          | 2 (9·1%)      |
| Missing                             | 6 (3·5%)                | 7 (4·1%)           | 4 (2·3%)           | 17 (3·3%)     | 1 (4·3%)          | 0 (0·0%)      |
| <b>Dysphagia (OG-25)</b>            |                         |                    |                    |               |                   |               |
| No                                  | 57 (34%)                | 45 (26%)           | 45 (26%)           | 147 (29%)     | 6 (26·1%)         | 7 (31·8%)     |
| Yes                                 | 108 (64%)               | 124 (73%)          | 124 (72%)          | 356 (69%)     | 16 (69·6%)        | 15 (68·2%)    |
| Missing                             | 5 (2·9%)                | 2 (1·2%)           | 4 (2·3%)           | 11 (2·1%)     | 1 (4·3%)          | 0 (0·0%)      |
| <b>Baseline Odynophagia (OG-25)</b> |                         |                    |                    |               |                   |               |
| No                                  | 65 (38%)                | 63 (37%)           | 64 (37%)           | 192 (37%)     | 10 (43·5%)        | 9 (40·9%)     |
| Yes                                 | 99 (58%)                | 106 (62%)          | 105 (61%)          | 310 (60%)     | 12 (52·2%)        | 13 (59·1%)    |
| Missing                             | 6 (3·5%)                | 2 (1·2%)           | 4 (2·3%)           | 12 (2·3%)     | 1 (4·3%)          | 0 (0·0%)      |
| <b>Trouble with taste (OG-25)</b>   |                         |                    |                    |               |                   |               |
| No                                  | 100 (59%)               | 108 (63%)          | 101 (58%)          | 309 (60%)     | 13 (56·5%)        | 14 (63·6%)    |
| Yes                                 | 65 (38%)                | 61 (36%)           | 68 (39%)           | 194 (38%)     | 9 (39·1%)         | 7 (31·8%)     |
| Missing                             | 5 (2·9%)                | 2 (1·2%)           | 4 (2·3%)           | 11 (2·1%)     | 1 (4·3%)          | 1 (4·5%)      |

|                                             | CHEMO-INTENSITY pathway |                    |                    |               | CHEMO-BSC pathway |               |
|---------------------------------------------|-------------------------|--------------------|--------------------|---------------|-------------------|---------------|
|                                             | Level A<br>(n=170)      | Level B<br>(n=171) | Level C<br>(n=173) | Total (n=514) | Level C<br>(n=23) | BSC<br>(n=22) |
| <b>Number of reported symptoms</b>          |                         |                    |                    |               |                   |               |
| 0                                           | 35 (21%)                | 23 (14%)           | 28 (16%)           | 86 (17%)      | 3 (13.0%)         | 6 (27.3%)     |
| 1                                           | 30 (18%)                | 40 (23%)           | 31 (18%)           | 101 (20%)     | 5 (21.7%)         | 3 (13.6%)     |
| 2                                           | 57 (34%)                | 67 (39%)           | 64 (37%)           | 188 (37%)     | 10 (43.5%)        | 6 (27.3%)     |
| 3                                           | 42 (25%)                | 39 (23%)           | 46 (27%)           | 127 (25%)     | 4 (17.4%)         | 6 (27.3%)     |
| Missing                                     | 6 (3.5%)                | 2 (1.2%)           | 4 (2.3%)           | 12 (2.3%)     | 1 (4.3%)          | 1 (4.5%)      |
| <b>BNP &gt; 100 or NT-Pro-BNP &gt; 400</b>  |                         |                    |                    |               |                   |               |
| No                                          | 96 (57%)                | 98 (57.0%)         | 102 (59%)          | 296 (58%)     | 11 (47.8%)        | 9 (40.9%)     |
| Yes                                         | 55 (32%)                | 61 (36%)           | 56 (32%)           | 172 (34%)     | 11 (47.8%)        | 13 (59.1%)    |
| Missing                                     | 19 (11%)                | 12 (7.0%)          | 15 (8.7%)          | 46 (8.9%)     | 1 (4.3%)          | 0 (0.0%)      |
| <b>Haemoglobin &lt;12 g/dl</b>              |                         |                    |                    |               |                   |               |
| No                                          | 94 (55%)                | 94 (55%)           | 90 (52%)           | 278 (54%)     | 12 (52.2%)        | 7 (31.8%)     |
| Yes                                         | 75 (44%)                | 77 (45%)           | 82 (47%)           | 234 (46%)     | 11 (47.8%)        | 15 (68.2%)    |
| Missing                                     | 1 (0.6%)                | 0 (0.0%)           | 1 (0.6%)           | 2 (0.4%)      |                   |               |
| <b>White Cell Count &gt; 11(*10/l)</b>      |                         |                    |                    |               |                   |               |
| No                                          | 141 (83%)               | 136 (80%)          | 141 (82%)          | 418 (81%)     | 14 (60.9%)        | 18 (81.8%)    |
| Yes                                         | 29 (17%)                | 35 (21%)           | 31 (18%)           | 95 (19%)      | 9 (39.1%)         | 4 (18.2%)     |
| Missing                                     | 0 (0.0%)                | 0 (0.0%)           | 1 (0.6%)           | 1 (0.2%)      |                   |               |
| <b>Neutrophil:lymphocyte ratio &gt; 4.0</b> |                         |                    |                    |               |                   |               |
| No                                          | 74 (44%)                | 90 (53%)           | 85 (49%)           | 249 (48%)     | 9 (39.1%)         | 9 (40.9%)     |
| Yes                                         | 96 (56.5%)              | 81 (47.4%)         | 87 (50.3%)         | 264 (51.4%)   | 14 (60.9%)        | 13 (59.1%)    |
| Missing                                     | 0 (0.0%)                | 0 (0.0%)           | 1 (0.6%)           | 1 (0.2%)      |                   |               |
| <b>Platelets &gt; 400(*10/l)</b>            |                         |                    |                    |               |                   |               |
| No                                          | 142 (84%)               | 141 (83%)          | 138 (80%)          | 421 (82%)     | 17 (73.9%)        | 15 (68.2%)    |
| Yes                                         | 28 (17%)                | 30 (18%)           | 34 (20%)           | 92 (18%)      | 6 (26.1%)         | 7 (31.8%)     |
| Missing                                     | 0 (0.0%)                | 0 (0.0%)           | 1 (0.6%)           | 1 (0.2%)      |                   |               |
| <b>GFR (formula derived) &lt;60ml/min</b>   |                         |                    |                    |               |                   |               |
| No                                          | 136 (80%)               | 126 (74%)          | 127 (73%)          | 389 (76%)     | 19 (82.6%)        | 13 (59.1%)    |
| Yes                                         | 32 (19%)                | 43 (25%)           | 42 (24%)           | 117 (23%)     | 4 (17.4%)         | 9 (40.9%)     |
| Missing                                     | 2 (1.2%)                | 2 (1.2%)           | 4 (2.3%)           | 8 (1.6%)      |                   |               |
| <b>Bilirubin &gt;21 umol/l</b>              |                         |                    |                    |               |                   |               |
| No                                          | 164 (97%)               | 164 (96%)          | 167 (97%)          | 495 (96%)     | 23 (100.0%)       | 22 (100.0%)   |
| Yes                                         | 6 (3.5%)                | 7 (4.1%)           | 5 (2.9%)           | 18 (3.5%)     |                   |               |
| Missing                                     | 0 (0.0%)                | 0 (0.0%)           | 1 (0.6%)           | 1 (0.2%)      |                   |               |
| <b>Albumin &lt;30 g/dl</b>                  |                         |                    |                    |               |                   |               |
| No                                          | 140 (82%)               | 139 (81%)          | 133 (77%)          | 412 (80%)     | 17 (73.9%)        | 18 (81.8%)    |
| Yes                                         | 30 (18%)                | 32 (19%)           | 38 (22%)           | 100 (20%)     | 6 (26.1%)         | 4 (18.2%)     |
| Missing                                     | 0 (0.0%)                | 0 (0.0%)           | 2 (1.2%)           | 2 (0.4%)      |                   |               |
| <b>Urea &gt;6 mmol/l</b>                    |                         |                    |                    |               |                   |               |
| No                                          | 105 (62%)               | 101 (59%)          | 113 (65%)          | 319 (62%)     | 13 (56.5%)        | 13 (59.1%)    |
| Yes                                         | 57 (34%)                | 64 (37%)           | 53 (31%)           | 174 (34%)     | 9 (39.1%)         | 8 (36.4%)     |
| Missing                                     | 8 (4.7%)                | 6 (3.5%)           | 7 (4.0%)           | 21 (4.1%)     | 1 (4.3%)          | 1 (4.5%)      |
| <b>Sodium &lt;135 mmol/l</b>                |                         |                    |                    |               |                   |               |
| No                                          | 133 (78%)               | 132 (77%)          | 129 (75%)          | 394 (77%)     | 17 (73.9%)        | 17 (77.3%)    |
| Yes                                         | 36 (21%)                | 39 (23%)           | 43 (25%)           | 118 (23%)     | 6 (26.1%)         | 5 (22.7%)     |
| Missing                                     | 1 (0.6%)                | 0 (0.0%)           | 1 (0.6%)           | 2 (0.4%)      |                   |               |
| <b>CEA &gt;3ug/ml or Ca19-9 &gt;37ku/l</b>  |                         |                    |                    |               |                   |               |
| No                                          | 60 (35%)                | 62 (36%)           | 62 (36%)           | 184 (36%)     | 11 (47.8%)        | 10 (45.5%)    |
| Yes                                         | 104 (61%)               | 109 (64%)          | 107 (62%)          | 320 (62%)     | 12 (52.2%)        | 12 (54.5%)    |
| Missing                                     | 6 (3.5%)                | 0 (0.0%)           | 4 (2.3%)           | 10 (1.9%)     |                   |               |

**eTable 3: Baseline Frailty domains**

Derived using the comprehensive health assessment (CHA).

|                                                                        | CHEMO-INTENSITY pathway |                 |                 | CHEMO-BSC pathway |            |
|------------------------------------------------------------------------|-------------------------|-----------------|-----------------|-------------------|------------|
|                                                                        | Level A (n=170)         | Level B (n=171) | Level C (n=173) | Level C (n=23)    | BSC (n=22) |
| <b>Weight Loss: BMI &lt; 18.5 (kg/m<sup>2</sup>)</b>                   |                         |                 |                 |                   |            |
| Yes                                                                    | 7 (4.1%)                | 13 (7.6%)       | 11 (6.4%)       | 2 (8.7%)          | 6 (27%)    |
| No                                                                     | 163 (96%)               | 157 (92%)       | 160 (93%)       | 21 (91%)          | 15 (68%)   |
| Missing                                                                | 0 (0.0%)                | 1 (0.6%)        | 2 (1.2%)        | 0 (0.0%)          | 1 (4.5%)   |
| <b>Weight Loss: 3kg or &gt;5%</b>                                      |                         |                 |                 |                   |            |
| Yes                                                                    | 92 (54%)                | 94 (55%)        | 85 (49%)        | 11 (48%)          | 10 (46%)   |
| No                                                                     | 78 (46%)                | 75 (44%)        | 85 (49%)        | 12 (52%)          | 11 (50%)   |
| Missing                                                                | 0 (0.0%)                | 2 (1.2%)        | 3 (1.7%)        | 0 (0.0%)          | 1 (4.5%)   |
| <b>Mobility: &gt;10 seconds or unable to complete test</b>             |                         |                 |                 |                   |            |
| Yes                                                                    | 103 (61%)               | 91 (53%)        | 95 (55%)        | 19 (83%)          | 14 (66%)   |
| No                                                                     | 64 (38%)                | 78 (46%)        | 75 (43%)        | 4 (17%)           | 7 (32%)    |
| Missing                                                                | 3 (1.8%)                | 2 (1.2%)        | 3 (1.7%)        | 0 (0.0%)          | 1 (4.5%)   |
| <b>Falls: Has had 2 or more falls in the past 6 months</b>             |                         |                 |                 |                   |            |
| Yes                                                                    | 8 (4.7%)                | 9 (5.3%)        | 7 (4.0%)        | 2 (8.7%)          | 0 (0.0%)   |
| No                                                                     | 162 (95%)               | 162 (95%)       | 166 (96%)       | 21 (91%)          | 22 (100%)  |
| <b>Cognition: Mild or severe dementia diagnosis</b>                    |                         |                 |                 |                   |            |
| Yes                                                                    | 22 (13%)                | 25 (15%)        | 26 (15%)        | 4 (17%)           | 3 (14%)    |
| No                                                                     | 148 (87%)               | 145 (85%)       | 147 (85%)       | 19 (83%)          | 18 (82%)   |
| Missing                                                                | 0 (0.0%)                | 1 (0.6%)        | 0 (0.0%)        | 0 (0.0%)          | 1 (4.5%)   |
| <b>Function: ADL/IADL</b>                                              |                         |                 |                 |                   |            |
| 0                                                                      | 73 (43%)                | 74 (43%)        | 73 (42%)        | 7 (30%)           | 3 (14%)    |
| 1                                                                      | 42 (25%)                | 32 (19%)        | 43 (25%)        | 4 (17%)           | 5 (23%)    |
| 2                                                                      | 30 (18%)                | 30 (18%)        | 23 (13%)        | 4 (17%)           | 4 (18%)    |
| 3                                                                      | 13 (7.6%)               | 17 (9.9%)       | 7 (4.0%)        | 2 (8.7%)          | 5 (22.7%)  |
| 4                                                                      | 7 (4.1%)                | 7 (4.1%)        | 11 (6.4%)       | 3 (13%)           | 2 (9.1%)   |
| 5                                                                      | 4 (2.4%)                | 7 (4.1%)        | 9 (5.2%)        | 1 (4.3%)          | 2 (9.1%)   |
| 6                                                                      | 1 (0.6%)                | 4 (2.3%)        | 6 (3.5%)        | 2 (8.7%)          | 0 (0.0%)   |
| 7                                                                      | 0 (0.0%)                | 0 (0.0%)        | 1 (0.6%)        | 0 (0.0%)          | 1 (4.5%)   |
| <b>Function: One or more impairment in ADL or IADL</b>                 |                         |                 |                 |                   |            |
| Yes                                                                    | 97 (57%)                | 97 (57%)        | 100 (58%)       | 16 (70%)          | 19 (86%)   |
| No                                                                     | 73 (43%)                | 74 (43%)        | 73 (42%)        | 7 (30%)           | 3 (14%)    |
| <b>Social: Required 24 hour care</b>                                   |                         |                 |                 |                   |            |
| Yes                                                                    | 0 (0.0%)                | 2 (1.2%)        | 1 (0.6%)        |                   |            |
| No                                                                     | 168 (99%)               | 168 (98%)       | 171 (99%)       | 23 (100%)         | 21 (96%)   |
| Missing                                                                | 2 (1.2%)                | 1 (0.6%)        | 1 (0.6%)        | 0 (0.0%)          | 1 (4.5%)   |
| <b>Mood: Extremely anxious or depressed</b>                            |                         |                 |                 |                   |            |
| Yes                                                                    | 2 (1.2%)                | 4 (2.3%)        | 3 (1.7%)        |                   |            |
| No                                                                     | 163 (96%)               | 160 (94%)       | 166 (96%)       | 21 (91%)          | 22 (100%)  |
| Missing                                                                | 5 (2.9%)                | 7 (4.1%)        | 4 (2.3%)        | 2 (8.7%)          | 0 (0.0%)   |
| <b>Fatigue: 'Very much for either needing to rest or was tired' or</b> |                         |                 |                 |                   |            |

|                                                               | CHEMO-INTENSITY pathway |                 |                 | CHEMO-BSC pathway |            |
|---------------------------------------------------------------|-------------------------|-----------------|-----------------|-------------------|------------|
|                                                               | Level A (n=170)         | Level B (n=171) | Level C (n=173) | Level C (n=23)    | BSC (n=22) |
| <b>'Quite a bit for both questions'</b>                       |                         |                 |                 |                   |            |
| Yes                                                           | 42 (25%)                | 42 (25%)        | 42 (24%)        | 5 (22%)           | 7 (32%)    |
| No                                                            | 117 (69%)               | 126 (74%)       | 121 (70%)       | 15 (65%)          | 15 (68%)   |
| Missing                                                       | 11 (6.5%)               | 3 (1.8%)        | 10 (5.8%)       | 3 (13.0%)         | 0 (0.0%)   |
|                                                               |                         |                 |                 |                   |            |
| <b>Polypharmacy: 5 or more prescribed regular medications</b> |                         |                 |                 |                   |            |
| Yes                                                           | 127 (75%)               | 129 (75%)       | 116 (67%)       | 19 (83%)          | 14 (64%)   |
| No                                                            | 42 (25%)                | 41 (24%)        | 56 (32%)        | 4 (17%)           | 7 (32%)    |
| Missing                                                       | 1 (0.6%)                | 1 (0.6%)        | 1 (0.6%)        | 0 (0.0%)          | 1 (4.5%)   |
|                                                               |                         |                 |                 |                   |            |



**eTable 4a Summaries of missing data for quality of life questionnaires in CHEMO-INTENSITY pathway (Percentage out of total expected questionnaires)**

| QoL time point     | EORTC-QLQ-C30      |                |                    | Fatigue            |                |                     | EQ-5D-3L           |                |                    |
|--------------------|--------------------|----------------|--------------------|--------------------|----------------|---------------------|--------------------|----------------|--------------------|
|                    | Number not missing | Number missing | Percentage missing | Number not missing | Number missing | Percentage missing* | Number not missing | Number missing | Percentage missing |
| Baseline           | 499                | 15             | 2.92               | 499                | 15             | 2.92                | 490                | 24             | 4.67               |
| Cycle 1            |                    |                |                    | 279                | 213            | 43.3                |                    |                |                    |
| Cycle 2            |                    |                |                    | 227                | 243            | 51.7                |                    |                |                    |
| 9 weeks / Cycle 3  | 230                | 121            | 34.5               | 314                | 121            | 27.8                | 297                | 138            | 31.7               |
| Cycle 4            |                    |                |                    | 160                | 246            | 60.6                |                    |                |                    |
| Cycle 5            |                    |                |                    | 148                | 232            | 61.1                |                    |                |                    |
| 18 weeks / Cycle 6 |                    |                |                    | 208                | 146            | 41.2                | 210                | 156            | 42.6               |
| 27 weeks           |                    |                |                    | 161                | 115            | 41.7                | 163                | 113            | 40.9               |
| 36 weeks           |                    |                |                    | 115                | 90             | 43.9                | 115                | 90             | 43.9               |
| 52 weeks           |                    |                |                    | 47                 | 42             | 47.2                | 48                 | 41             | 46.1               |

\*Percentage out of total expected questionnaires

**eTable 4b Summaries of missing data for quality of life questionnaires in the CHEMO-BSC pathway**

| QoL time point     | Fatigue            |                |                    | EQ-5D-3L           |                |                    |
|--------------------|--------------------|----------------|--------------------|--------------------|----------------|--------------------|
|                    | Number not missing | Number missing | Percentage missing | Number not missing | Number missing | Percentage missing |
| Baseline           | 43                 | 2              | 4.44               | 43                 | 2              | 4.44               |
| Cycle 1            | 4                  | 28             | 87.5               |                    |                |                    |
| Cycle 2            | 2                  | 25             | 92.6               |                    |                |                    |
| 9 weeks / Cycle 3  | 14                 | 9              | 39.1               | 12                 | 11             | 47.8               |
| Cycle 4            | 1                  | 19             | 95.0               |                    |                |                    |
| Cycle 5            | 1                  | 15             | 93.8               |                    |                |                    |
| 18 weeks / Cycle 6 | 8                  | 7              | 46.7               | 8                  | 7              | 46.7               |
| 27 weeks           | 2                  | 7              | 77.8               | 2                  | 7              | 77.8               |
| 36 weeks           | 1                  | 2              | 66.7               | 1                  | 2              | 66.7               |
| 52 weeks           | 1                  | 0              | 0                  | 1                  | 0              | 0                  |

\*Percentage out of total expected questionnaires

**eTable 5: EORTC-QLQ-C30 Global health status in the CHEMO-INTENSITY pathway**

(mean and 95% Confidence Intervals for baseline, adjusted mean and 95% Confidence Intervals for 9 weeks)

|                             | Level A     | Level B     | Level C     |
|-----------------------------|-------------|-------------|-------------|
| <b>Global health status</b> |             |             |             |
| Baseline                    | 60 (57, 63) | 57 (54, 61) | 61 (58, 64) |
| 9 weeks                     | 60 (57, 64) | 63 (59, 66) | 66 (62, 69) |

**eTable 6: EORTC-QLQ-C30 Functional scales in the CHEMO-INTENSITY pathway**

(mean and 95% Confidence Intervals for baseline, adjusted mean and 95% Confidence Intervals for 9 weeks)

|                              | Level A     | Level B     | Level C     |
|------------------------------|-------------|-------------|-------------|
| <b>Physical functioning</b>  |             |             |             |
| Baseline                     | 76 (73, 79) | 73 (70, 76) | 74 (71, 77) |
| 9 weeks                      | 65 (62, 68) | 67 (63, 70) | 71 (68, 74) |
| <b>Role functioning</b>      |             |             |             |
| Baseline                     | 7 (69, 77)  | 68 (63, 72) | 68 (63, 73) |
| 9 weeks                      | 61 (57, 65) | 66 (61, 70) | 70 (66, 74) |
| <b>Emotional functioning</b> |             |             |             |
| Baseline                     | 79 (76, 81) | 76 (73, 80) | 77 (73, 80) |
| 9 weeks                      | 80 (77, 83) | 78 (75, 81) | 81 (78, 84) |
| <b>Cognitive functioning</b> |             |             |             |
| Baseline                     | 86 (83, 89) | 84 (81, 88) | 85 (82, 88) |
| 9 weeks                      | 80 (76, 83) | 83 (80, 86) | 83 (80, 86) |
| <b>Social functioning</b>    |             |             |             |
| Baseline                     | 76 (71, 80) | 71 (66, 75) | 72 (67, 76) |
| 9 weeks                      | 68 (63, 72) | 75 (70, 80) | 77 (73, 82) |

**eTable 7: EORTC-QLQ-C30 Symptom scales in the CHEMO-INTENSITY pathway**

(mean and 95% Confidence Intervals for baseline, adjusted mean and 95% Confidence Intervals for 9 weeks)

|                          | Level A     | Level B      | Level C     |
|--------------------------|-------------|--------------|-------------|
| <b>Fatigue</b>           |             |              |             |
| Baseline                 | 38 (34, 42) | 42 (38, 46)  | 39 (35, 43) |
| 9 weeks                  | 46 (42, 50) | 45 (41, 49)  | 37 (33, 41) |
| <b>Nausea / Vomiting</b> |             |              |             |
| Baseline                 | 15 (11, 18) | 17 (14, 21)  | 17 (14, 21) |
| 9 weeks                  | 17 (13, 20) | 11 (7.5, 14) | 11 (8, 14)  |
| <b>Pain</b>              |             |              |             |
| Baseline                 | 29 (24, 33) | 24 (20, 28)  | 25 (21, 29) |
| 9 weeks                  | 17 (13, 21) | 20 (16, 24)  | 17 (13, 20) |

**eTable 8: EORTC-QLQ-C30 Symptom scales - CHEMO-INTENSITY pathway**

(mean and 95% Confidence Intervals for baseline, adjusted mean and 95% Confidence Intervals for 9 weeks)

|                           | Level A          | Level B        | Level C        |
|---------------------------|------------------|----------------|----------------|
| <b>Dyspnoea</b>           |                  |                |                |
| Baseline                  | 24 (20, 28)      | 27 (22, 31)    | 23 (18, 27)    |
| 9 weeks                   | 25 (21, 30)      | 30 (26, 34)    | 20 (16, 24)    |
| <b>Insomnia</b>           |                  |                |                |
| Baseline                  | 29 (24, 34)      | 28 (24, 33)    | 30 (25, 35)    |
| 9 weeks                   | 24 (19, 29)      | 27 (22, 32)    | 27 (22, 31)    |
| <b>Appetite loss</b>      |                  |                |                |
| Baseline                  | 41 (36, 47)      | 46 (41, 51)    | 43 (37, 48)    |
| 9 weeks                   | 33 (28, 38)      | 32 (27, 37)    | 27 (22, 32)    |
| <b>Constipation</b>       |                  |                |                |
| Baseline                  | 31 (26, 35)      | 28 (23, 32)    | 23 (19, 28)    |
| 9 weeks                   | 22 (18, 26)      | 15 (11, 20)    | 17 (13, 21)    |
| <b>Diarrhoea</b>          |                  |                |                |
| Baseline                  | 12 (8.3, 15)     | 6.1 (3.8, 8.4) | 9.7 (6.5, 13)  |
| 9 weeks                   | 15.1 (11, 19)    | 12 (8.3, 16)   | 11 (7.6, 14.9) |
| <b>Financial Problems</b> |                  |                |                |
| Baseline                  | 7.6 (4.47, 10.8) | 8.8 (5.5, 12)  | 8.9 (5.75, 12) |
| 9 weeks                   | 5.7 (3.33, 8.15) | 4.9 (2.5, 7.3) | 3.7 (1.3, 6.0) |

**eTable 9: EORTC-QLQ-C30 Fatigue scale in the CHEMO-INTENSITY pathway**

(mean and 95% Confidence Intervals for baseline, adjusted mean and 95% Confidence Intervals for subsequent assessments)

|                    | Level A           | Level B           | Level C           |
|--------------------|-------------------|-------------------|-------------------|
| Baseline           | 38.4 (34.5, 42.3) | 42.2 (38.5, 46.0) | 38.8 (34.9, 42.7) |
| Cycle 1            | 44.8 (40.4, 49.2) | 43.9 (39.6, 48.1) | 43.8 (39.8, 47.9) |
| Cycle 2            | 48.2 (43.0, 53.4) | 42.7 (37.4, 48.1) | 41.9 (36.7, 47.0) |
| 9 weeks / Cycle 3  | 47.0 (42.4, 51.5) | 45.6 (41.1, 50.2) | 38.3 (33.8, 42.7) |
| Cycle 4            | 44.7 (38.7, 50.7) | 47.7 (41.7, 53.7) | 48.8 (43.2, 54.4) |
| Cycle 5            | 43.8 (37.6, 50.0) | 48.4 (42.2, 54.7) | 45.0 (39.4, 50.6) |
| 18 weeks / Cycle 6 | 46.7 (41.0, 52.3) | 51.0 (45.5, 56.5) | 48.0 (42.8, 53.1) |
| 27 weeks           | 48.8 (42.0, 55.7) | 56.0 (49.3, 62.6) | 54.5 (48.0, 61.0) |
| 36 weeks           | 46.1 (38.8, 53.5) | 63.9 (56.9, 71.0) | 49.4 (42.4, 56.3) |
| 52 weeks           | 64.8 (53.6, 76.0) | 63.0 (51.2, 74.8) | 59.7 (48.6, 70.8) |

**eTable 10: EORTC-OG-25 Symptom scales in the CHEMO-INTENSITY pathway**  
 (mean and 95% Confidence Intervals for baseline, adjusted mean and 95% Confidence Intervals for subsequent assessments)

|                            | Level A           | Level B             | Level C             |
|----------------------------|-------------------|---------------------|---------------------|
| <b>Dysphagia</b>           |                   |                     |                     |
| Baseline                   | 22.1 (18.5, 25.7) | 22.5 (19.2, 25.8)   | 22.2 (19.0, 25.3)   |
| 9 weeks                    | 11.4 ( 8.8, 14.0) | 12.3 ( 9.7, 15.0)   | 9.7 ( 7.2, 12.3)    |
|                            |                   |                     |                     |
| <b>Odynophagia</b>         |                   |                     |                     |
| Baseline                   | 22.5 (18.7, 26.2) | 23.5 (19.4, 27.5)   | 23.6 (19.6, 27.6)   |
| 9 weeks                    | 11.1 ( 8.2, 14.0) | 10.9 ( 7.8, 13.8)   | 10.2 ( 7.3, 13.1)   |
|                            |                   |                     |                     |
| <b>Pain and discomfort</b> |                   |                     |                     |
| Baseline                   | 26.9 (22.7, 31.1) | 27.0 (22.92, 31.05) | 27.0 (22.78, 31.26) |
| 9 weeks                    | 15.8 (12.4, 19.1) | 16.2 (12.82, 19.49) | 18.4 (15.08, 21.65) |
|                            |                   |                     |                     |
| <b>Trouble with taste</b>  |                   |                     |                     |
| Baseline                   | 21.4 (16.6, 26.2) | 18.7 (14.4, 23.1)   | 19.3 (15.2, 23.5)   |
| 9 weeks                    | 26.5 (21.6, 31.3) | 23.9 (19.0, 28.7)   | 20.2 (15.4, 25.0)   |
|                            |                   |                     |                     |

**eTable 11: Summaries of best response**

By allocated treatment and differences between standard and experimental groups with exact 90% confidence intervals.

|                                     | Level A (n=125)        | Level B (n=112)        | Level C (n=112)        | Level A vs.<br>Level B   | Level A vs.<br>Level C |
|-------------------------------------|------------------------|------------------------|------------------------|--------------------------|------------------------|
| <b>RECIST response at week 9-52</b> |                        |                        |                        |                          |                        |
| Responses: CR + PR                  | 59 (47%)<br>(40, 55)   | 32 (29%)<br>(22, 36)   | 35 (31%)<br>(24, 39)   | 19%<br>( 8 to 29)        | 16%<br>( 5 to 26)      |
| Disease control: CR + PR + SD       | 86 (69%)<br>(61, 76)   | 69 (62%)<br>(53, 69)   | 70 (63%)<br>(54, 70)   | 7.2%<br>( -3.5 to 17.8)  | 6.3%<br>( -4.4 to 17)  |
| Complete response                   | 6 (4.8%)<br>(2, 9)     | 5 (4.5%)<br>(2, 9)     | 5 (4.5%)<br>(2, 9)     | 0.3%<br>( -10.3 to 11.0) | 0.3%<br>( -10 to 11)   |
| Partial response                    | 53 (42%)<br>(35, 50)   | 27 (24%)<br>(18, 32)   | 30 (27%)<br>(20, 35)   | 18%<br>( 7.6 to 29)      | 16%<br>( 4.9 to 26)    |
| Stable disease                      | 27 (22%)<br>(16, 29)   | 37 (33%)<br>(26, 41)   | 35 (31%)<br>(24, 39)   | -11%<br>( -21.9 to -0.7) | -9.7%<br>( -20 to 1.1) |
| Progressive disease                 | 13 (10%)<br>(6.3, 16)  | 18 (16%)<br>(11, 23)   | 13 (12%)<br>(7.0, 18)  | -5.7%<br>( -16.3 to 5.0) | -1.2%<br>( -12 to 10)  |
| Non measureable disease             | 1 (0.8%)<br>(0.1, 3.7) | 0 (0.0%)<br>(0.0, 2.6) | 2 (1.8%)<br>(0.3, 5.5) | 0.8%<br>( -9.9 to 11.5)  | -1.0%<br>( -12 to 8)   |
| No assessment                       | 25 (20%)<br>(14, 26)   | 25 (22%)<br>(16, 30)   | 27 (24%)<br>(18, 32)   | -2.3%<br>( -13.0 to 8.4) | -4.1%<br>( -15 to 7)   |

**eTable 12: Factors Associated with OTU outcome**

(multivariable analysis)

|                                                          | Odds of a worse outcome (95% CI) | Chi-sq | Degrees of freedom | p value |
|----------------------------------------------------------|----------------------------------|--------|--------------------|---------|
| <b>Frailty</b>                                           |                                  |        |                    |         |
| Severely frail ( $\geq 3$ ) vs. Not/Slightly frail (0-2) | 1.44 (1.03-2.02)                 | 4.51   | 1                  | 0.034   |
| <b>Baseline VAS &lt;50 (EQ-5D)</b>                       |                                  |        |                    |         |
| Yes vs. No                                               | 1.69 (1.06- 2.69)                | 4.87   | 1                  | 0.027   |
| <b>Neutrophil:lymphocyte ratio &gt; 4.0</b>              |                                  |        |                    |         |
| Yes vs. No                                               | 1.59 (1.14, 2.20)                | 7.65   | 1                  | 0.006   |

**Table 13: Lookup table for multivariable prognostic model**

| Baseline Frailty                                   | Baseline QL (EQ-5D VAS)        | Baseline NLR              | Predicted class probabilities |                                 |                         |
|----------------------------------------------------|--------------------------------|---------------------------|-------------------------------|---------------------------------|-------------------------|
|                                                    |                                |                           | probability of Good OTU       | probability of Intermediate OTU | probability of Poor OTU |
| Not/Slightly frail (0-2)                           | VAS score $\geq 50$            | NLR $\leq 4.0$            | 0.44                          | 0.29                            | 0.27                    |
| Not/Slightly frail (0-2)                           | VAS score $\geq 50$            | <b><i>NLR &gt;4.0</i></b> | 0.35                          | 0.30                            | 0.36                    |
| Not/Slightly frail (0-2)                           | <b><i>VAS score &lt;50</i></b> | NLR $\leq 4.0$            | 0.33                          | 0.30                            | 0.38                    |
| <b><i>Severely frail (<math>\geq 3</math>)</i></b> | VAS score $\geq 50$            | NLR $\leq 4.0$            | 0.35                          | 0.30                            | 0.35                    |
| Not/Slightly frail (0-2)                           | <b><i>VAS score &lt;50</i></b> | <b><i>NLR &gt;4.0</i></b> | 0.24                          | 0.28                            | 0.47                    |
| <b><i>Severely frail (<math>\geq 3</math>)</i></b> | VAS score $\geq 50$            | <b><i>NLR &gt;4.0</i></b> | 0.26                          | 0.29                            | 0.45                    |
| <b><i>Severely frail (<math>\geq 3</math>)</i></b> | <b><i>VAS score &lt;50</i></b> | NLR $\leq 4.0$            | 0.25                          | 0.28                            | 0.47                    |
| <b><i>Severely frail (<math>\geq 3</math>)</i></b> | <b><i>VAS score &lt;50</i></b> | <b><i>NLR &gt;4.0</i></b> | 0.18                          | 0.25                            | 0.57                    |

QL=quality of life; VAS=visual analogue scale ( $\geq 50$  = better QL;  $<50$  = worse QL); NLR=neutrophil:lymphocyte ratio; OTU=overall treatment utility

Adverse baseline characteristics shown in ***bold italics***

**eTable 14: Predictive ability of the multivariable prognostic model evaluated at each variable combination**

| Normalised linear predictor | Linear predictor corresponds to: |                                 |                    | Odds of a worse outcome (95% CI) |                     | Predicted class probabilities |             |                     |             |
|-----------------------------|----------------------------------|---------------------------------|--------------------|----------------------------------|---------------------|-------------------------------|-------------|---------------------|-------------|
|                             | Baseline Frailty                 | Baseline QL (EQ-5D VAS)         | Baseline NLR ratio | Level B vs. Level A              | Level C vs. Level A | Allocation                    | P(Good OTU) | P(Intermediate OTU) | P(Poor OTU) |
| 1                           | Not/Slightly frail (0-2)         | VAS score $\geq$ 50 (better QL) | NLR $\leq$ 4.0     | 1.01 (0.50-2.00)                 | 0.33 (0.16-0.68)    | Level A                       | 0.41        | 0.30                | 0.29        |
|                             |                                  |                                 |                    |                                  |                     | Level B                       | 0.41        | 0.30                | 0.29        |
|                             |                                  |                                 |                    |                                  |                     | Level C                       | 0.68        | 0.20                | 0.12        |
| 0.698                       | Severely frail ( $\geq$ 3)       | VAS score $\geq$ 50 (better QL) | NLR $\leq$ 4.0     | 1.13 (0.74-1.73)                 | 0.62 (0.40-0.94)    | Level A                       | 0.38        | 0.30                | 0.32        |
|                             |                                  |                                 |                    |                                  |                     | Level B                       | 0.35        | 0.30                | 0.35        |
|                             |                                  |                                 |                    |                                  |                     | Level C                       | 0.50        | 0.28                | 0.22        |
| 0.685                       | Not/Slightly frail (0-2)         | VAS score $\geq$ 50 (better QL) | NLR $>$ 4.0        | 1.14 (0.75-1.73)                 | 0.63 (0.42-0.96)    | Level A                       | 0.38        | 0.30                | 0.32        |
|                             |                                  |                                 |                    |                                  |                     | Level B                       | 0.35        | 0.30                | 0.35        |
|                             |                                  |                                 |                    |                                  |                     | Level C                       | 0.49        | 0.30                | 0.23        |
| 0.617                       | Not/Slightly frail (0-2)         | VAS score $<$ 50 (worse QL)     | NLR $\leq$ 4.0     | 1.17 (0.79-1.74)                 | 0.73 (0.49-1.08)    | Level A                       | 0.37        | 0.30                | 0.33        |
|                             |                                  |                                 |                    |                                  |                     | Level B                       | 0.33        | 0.30                | 0.36        |
|                             |                                  |                                 |                    |                                  |                     | Level C                       | 0.45        | 0.29                | 0.26        |
| 0.383                       | Severely frail ( $\geq$ 3)       | VAS score $\geq$ 50 (better QL) | NLR $>$ 4.0        | 1.29 (0.78-2.13)                 | 1.17 (0.72-1.90)    | Level A                       | 0.35        | 0.30                | 0.35        |
|                             |                                  |                                 |                    |                                  |                     | Level B                       | 0.29        | 0.30                | 0.41        |
|                             |                                  |                                 |                    |                                  |                     | Level C                       | 0.31        | 0.30                | 0.39        |
| 0.315                       | Severely frail ( $\geq$ 3)       | VAS score $<$ 50 (worse QL)     | NLR $\leq$ 4.0     | 1.32 (0.75-2.33)                 | 1.35 (0.78-2.33)    | Level A                       | 0.34        | 0.03                | 0.36        |
|                             |                                  |                                 |                    |                                  |                     | Level B                       | 0.28        | 0.30                | 0.42        |
|                             |                                  |                                 |                    |                                  |                     | Level C                       | 0.28        | 0.30                | 0.43        |
| 0.302                       | Not/Slightly frail (0-2)         | VAS score $<$ 50 (worse QL)     | NLR $>$ 4.0        | 1.33                             | 1.38 (0.79-2.43)    | Level A                       | 0.34        | 0.30                | 0.36        |

| Normalised linear predictor | Linear predictor corresponds to: |                             |                    | Odds of a worse outcome (95% CI) |                     | Predicted class probabilities |             |                     |             |
|-----------------------------|----------------------------------|-----------------------------|--------------------|----------------------------------|---------------------|-------------------------------|-------------|---------------------|-------------|
|                             | Baseline Frailty                 | Baseline QL (EQ-5D VAS)     | Baseline NLR ratio | Level B vs. Level A              | Level C vs. Level A | Allocation                    | P(Good OTU) | P(Intermediate OTU) | P(Poor OTU) |
|                             |                                  |                             |                    | (0.74-2.38)                      |                     | Level B                       | 0.28        | 0.30                | 0.43        |
|                             |                                  |                             |                    |                                  | Level C             | 0.27                          | 0.30        | 0.44                |             |
| 00                          | Severely frail ( $\geq 3$ )      | VAS score $< 50$ (worse QL) | NLR $> 4.0$        | 1.50 (0.59-3.83)                 | 2.56 (1.02-6.46)    | Level A                       | 0.31        | 0.30                | 0.39        |
|                             |                                  |                             |                    |                                  |                     | Level B                       | 0.23        | 0.28                | 0.49        |
|                             |                                  |                             |                    |                                  |                     | Level C                       | 0.15        | 0.23                | 0.62        |

**eTable 15 Chemotherapy delivery and tolerability (CHEMO-INTENSITY randomisation)**

[Note that participants who did not receive any treatment were excluded so only 492 participants were included in this table]

|                                                                                       | Level A   | Level B  | Level C  |
|---------------------------------------------------------------------------------------|-----------|----------|----------|
| n                                                                                     | 170       | 171      | 173      |
| Started treatment                                                                     | 161       | 163      | 168      |
| Required dose-reduction for toxicity (cycle 1-3)                                      | 63 (39%)  | 39 (24%) | 21 (13%) |
| Stopped for toxicity (cycle 1-3)                                                      | 53 (33%)  | 47 (29%) | 34 (20%) |
| Any of the above (dose-reduction <u>or</u> stop)                                      | 104 (65%) | 79 (49%) | 51 (30%) |
| Tolerated treatment but stopped before cycle 3 because of cancer progression or death | 18 (11%)  | 31 (19%) | 31 (19%) |
| Received 3 cycles at intended dose without delay ( $> 1$ week)                        | 51 (32%)  | 72 (44%) | 97 (58%) |



## Supplementary Figures

**eFigure 1. Influence of baseline factors and dose level on OTU**

|                             |         | n   | 0% 20% 40% 60% 80% 100%                                                              | odds of a worse OTU (95%CI) | main effect test        |
|-----------------------------|---------|-----|--------------------------------------------------------------------------------------|-----------------------------|-------------------------|
|                             |         |     |     |                             |                         |
| All patients                | Level A | 170 |    | reference                   |                         |
|                             | Level B | 171 |    | 1.15 (0.78-1.70)            | 0.49                    |
|                             | Level C | 173 |    | 0.81 (0.54-1.19)            | 0.28                    |
|                             |         |     |                                                                                      |                             | <b>interaction test</b> |
| Age <75                     | Level A | 73  |    | reference                   |                         |
|                             | Level B | 73  |    | 0.97 (0.53-1.75)            | A vs. B<br>0.46         |
|                             | Level C | 72  |    | 0.75 (0.41-1.37)            |                         |
| Age ≥75                     | Level A | 97  |    | reference                   | A vs. C<br>0.81         |
|                             | Level B | 98  |    | 1.30 (0.76-2.17)            |                         |
|                             | Level C | 101 |    | 0.83 (0.50-1.39)            |                         |
| PS 0-1                      | Level A | 117 |    | reference                   |                         |
|                             | Level B | 116 |    | 1.11 (0.69-1.79)            | A vs. B<br>0.84         |
|                             | Level C | 120 |    | 0.66 (0.41-1.06)            |                         |
| PS ≥2                       | Level A | 53  |    | reference                   | A vs. C<br>0.15         |
|                             | Level B | 55  |    | 1.22 (0.61-2.44)            |                         |
|                             | Level C | 53  |    | 1.23 (0.61-2.50)            |                         |
| Non-frail or slightly frail | Level A | 67  |   | reference                   |                         |
|                             | Level B | 75  |  | 0.96 (0.52-1.78)            | A vs. B<br>0.42         |
|                             | Level C | 73  |  | 0.53 (0.28-1.00)            |                         |
| Severely frail              | Level A | 103 |  | reference                   | A vs. C<br>0.09         |
|                             | Level B | 96  |  | 1.34 (0.80-2.25)            |                         |
|                             | Level C | 100 |  | 1.06 (0.64-1.79)            |                         |

This analysis includes all 514 patients in the CHEMO-INTENSITY pathway. All odds ratios are adjusted for the minimisation stratification factors (age, PS, metastases, histology (squamous/other), renal function, planned use of trastuzumab). Tests for interaction are a one degree of freedom test for two-category subgroups which sought treatment effect heterogeneity.

eFigure 2. Univariate analysis: impact of baseline variables Overall Treatment Utility

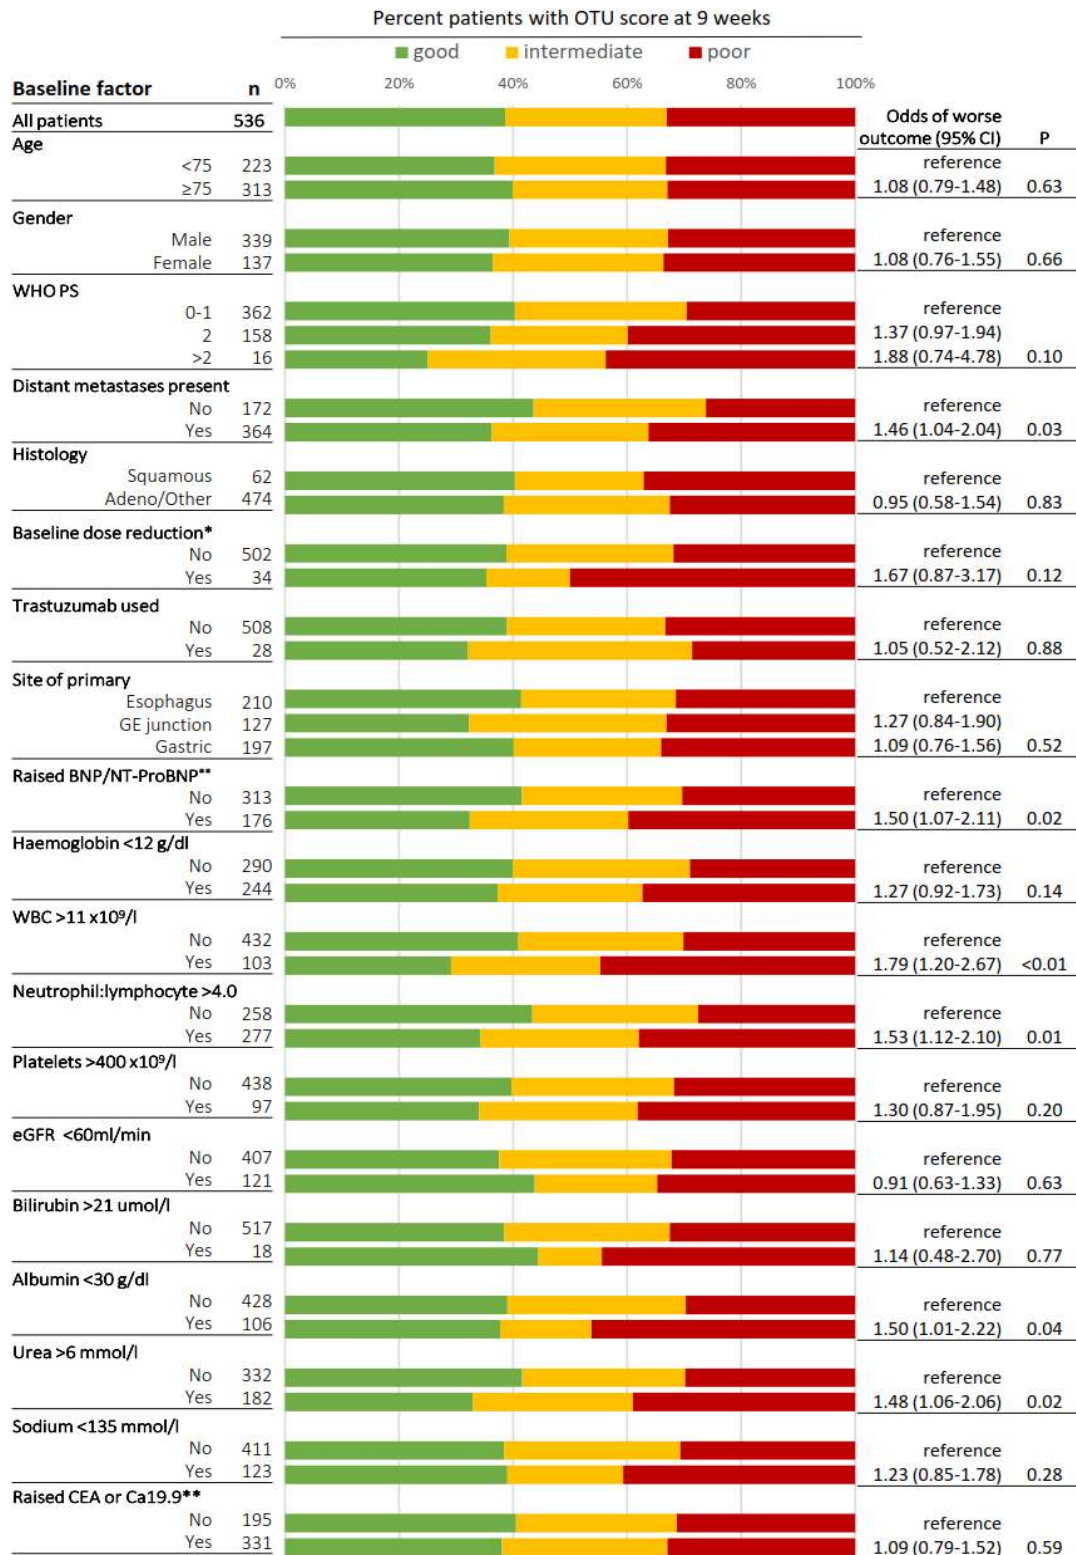

This analysis includes all patients allocated chemotherapy (all 514 in the CHEMO-INTENSITY plus 23 in the CHEMO-BSC pathway). Patients allocated BSC alone are not included as OTU cannot be scored in patients not allocated chemotherapy. \*A baseline capecitabine dose reduction of 25% was mandated for patients with eGFR 30-50ml/min or bilirubin 1.5-2 xULN. Patients with eGFR <30 or bili >2xULN were not eligible. \*\* "Raised" defined as: BNP>100 pg/ml, NT-proBNP >400 pg/ml, CEA >3 ug/ml, Ca19.9 >37 kU/l

eFigure 3 Univariate analysis : Impact of baseline symptoms Overall Treatment Utility

Percent patients with OTU score at 9 weeks

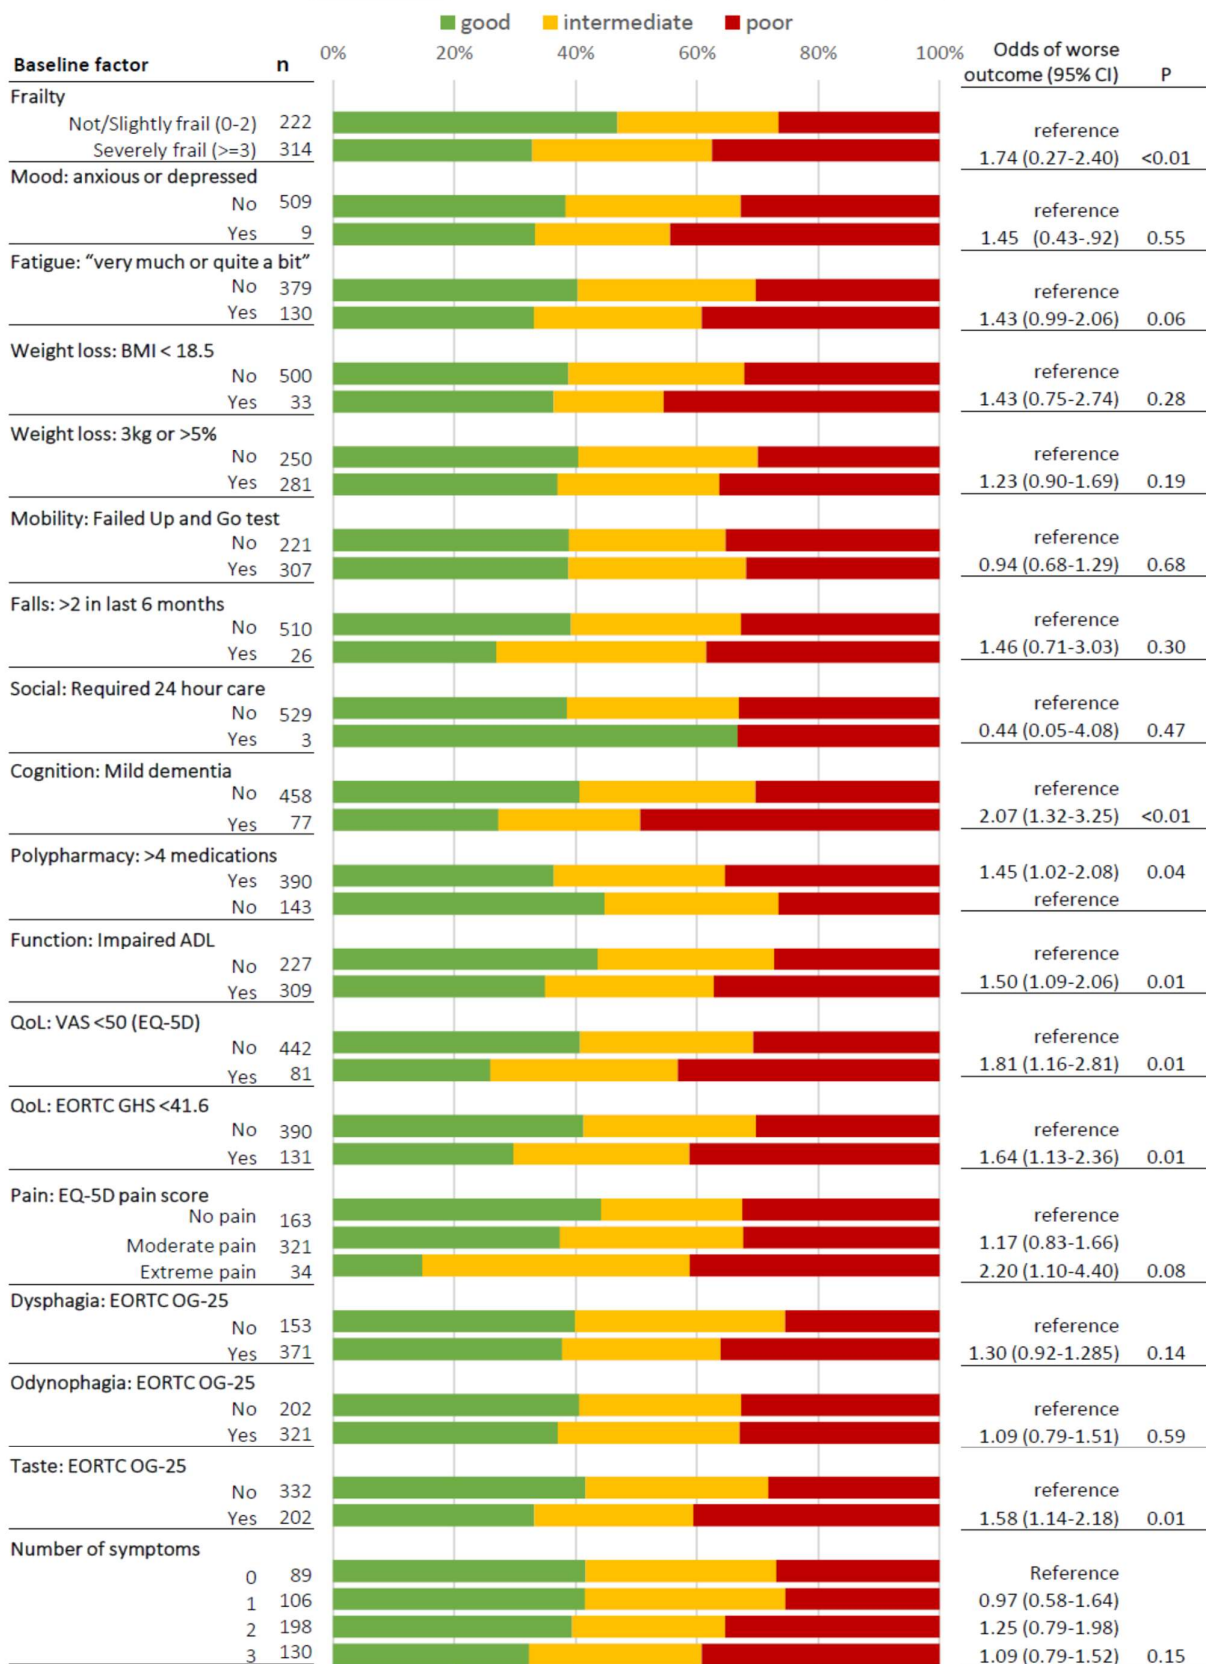

eFigure 4: Forest plot for CHEMO-INTENSITY PFS (Level A vs. Level B)

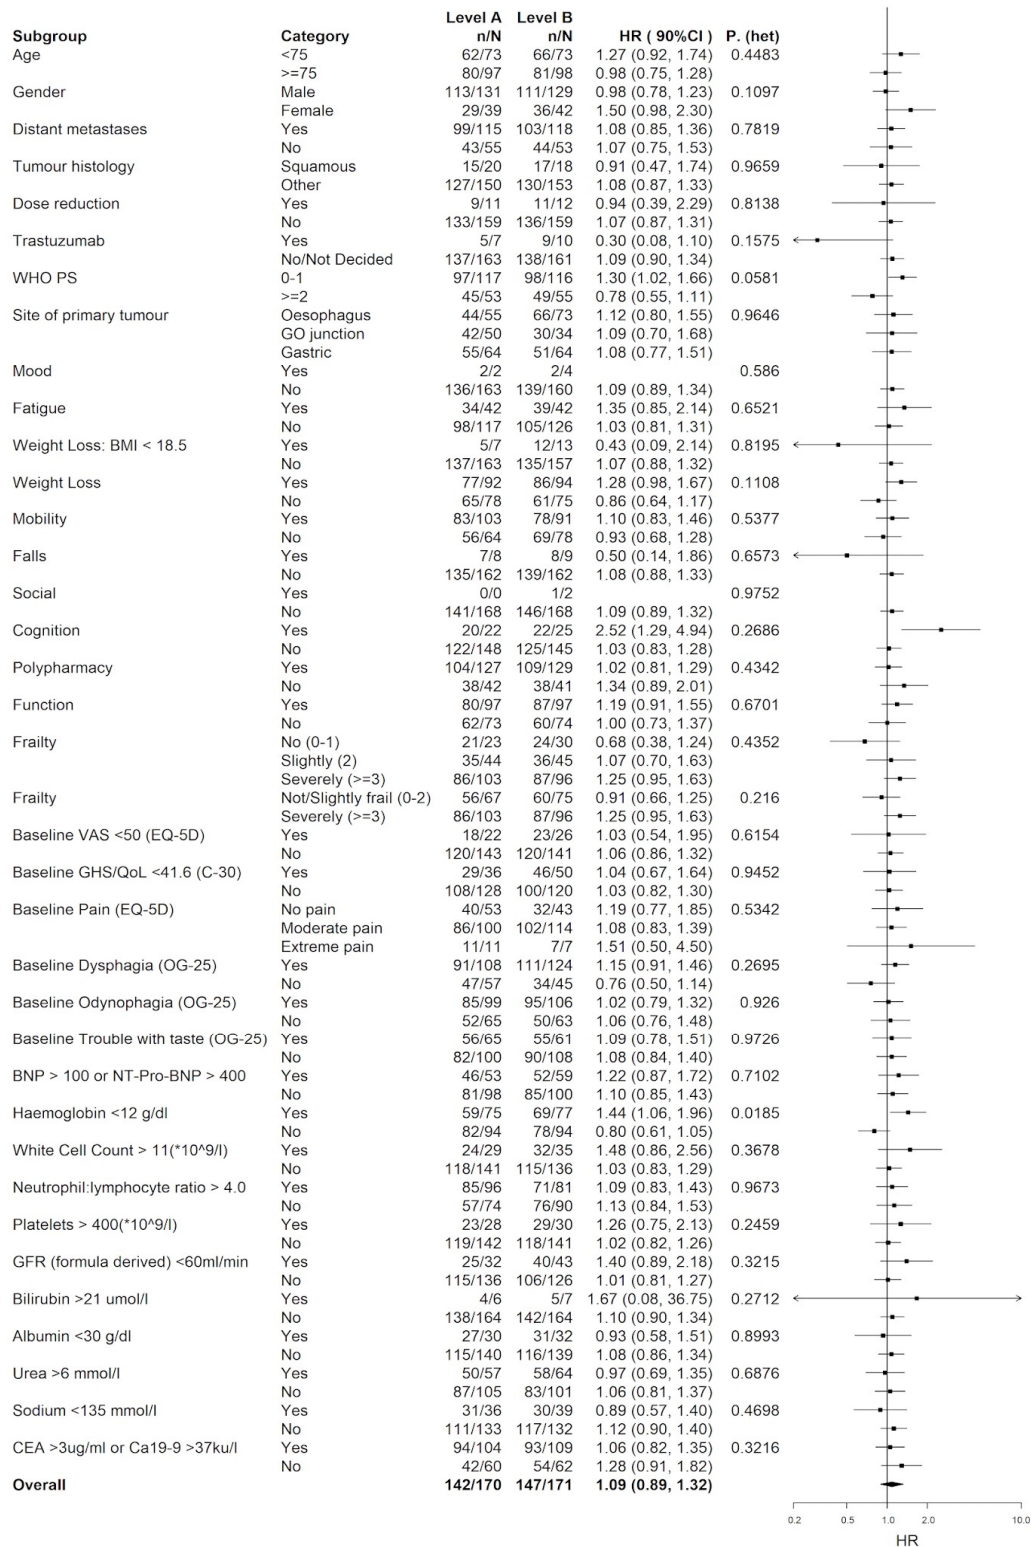

**eFigure 5: Forest plot for CHEMO-INTENSITY PFS (Level A vs. Level C)**

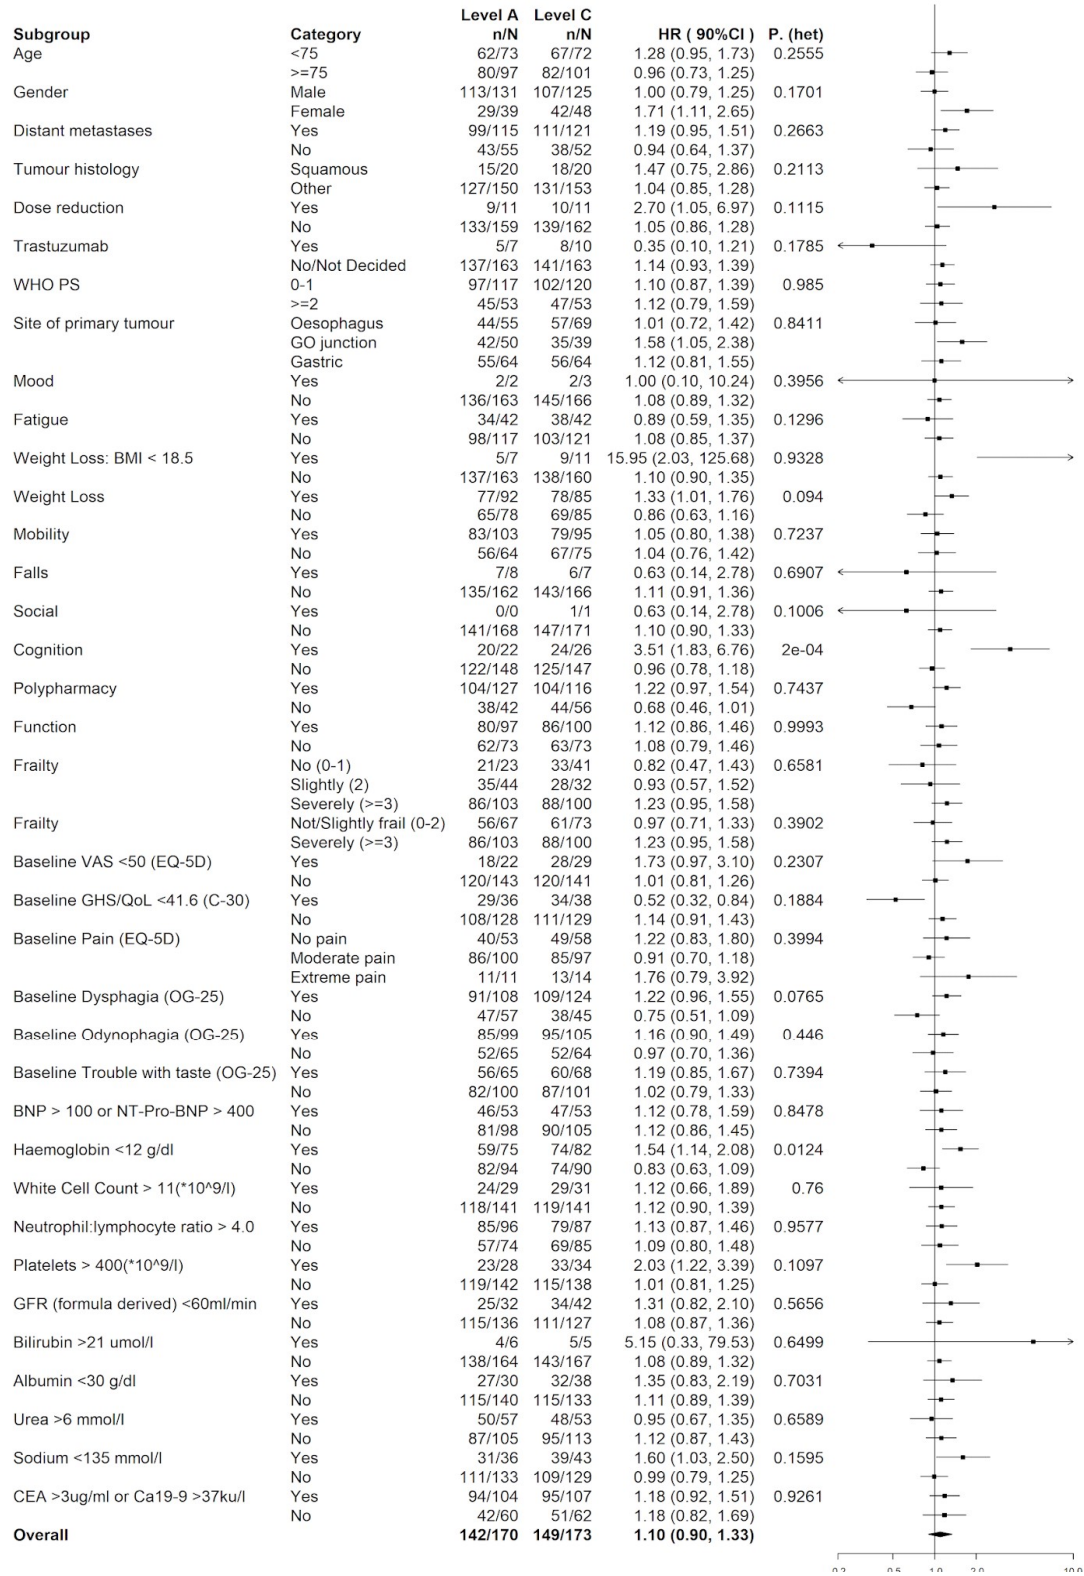

**eFigure 6: Forest plot for CHEMO-INTENSITY OS (Level A vs. Level B)**

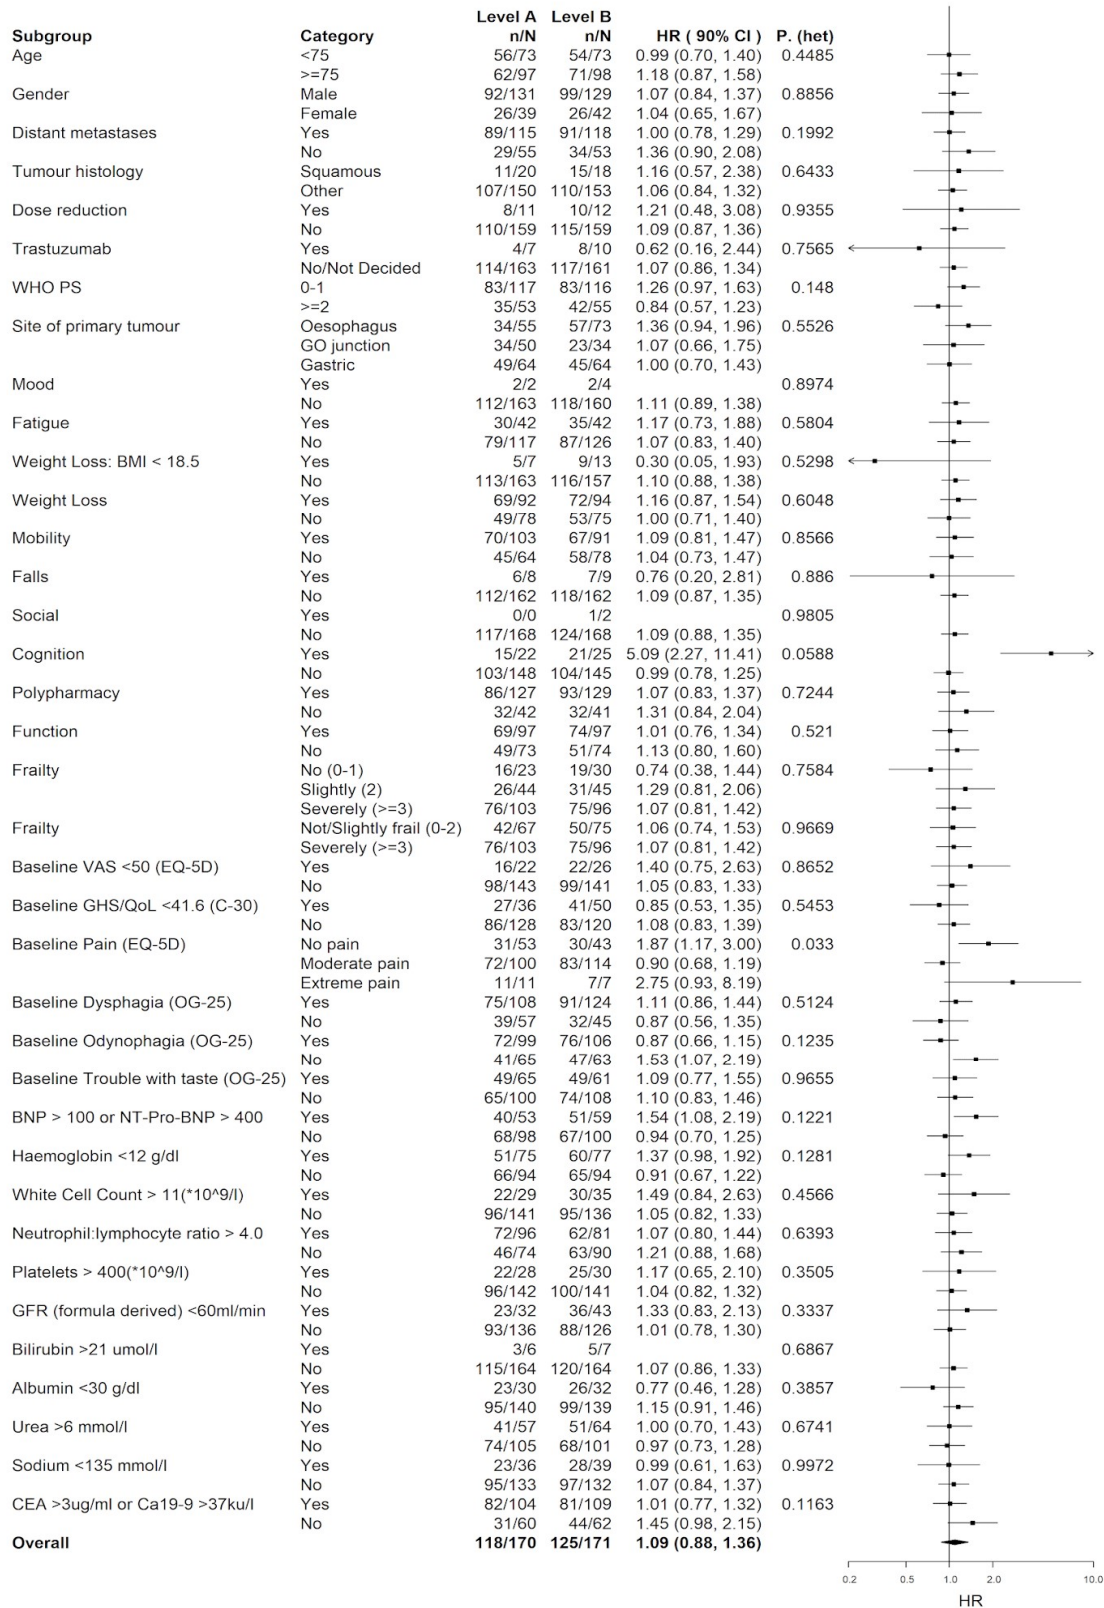

eFigure 7: Forest plot for CHEMO-INTENSITY OS (Level A vs. Level C)

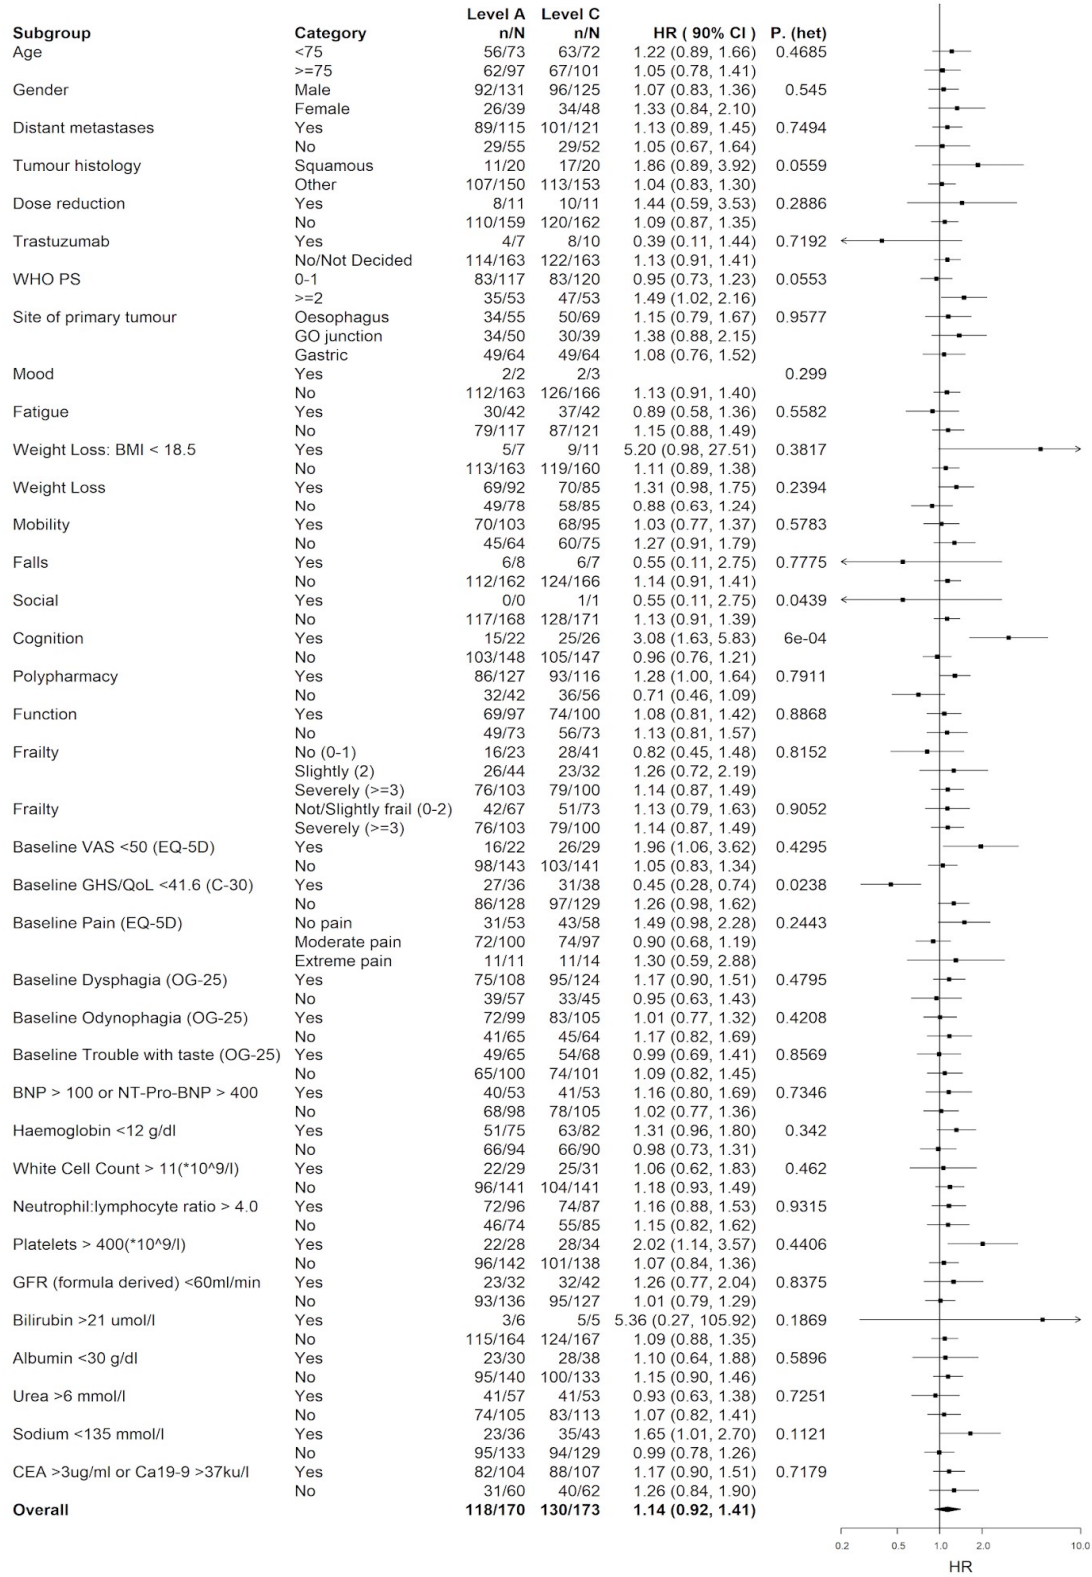

**eFigure 8: EORTC-QLQ-C30 Fatigue scale in the CHEMO-INTENSITY pathway**  
 (Mean and 95% Confidence Intervals for baseline, adjusted mean and 95% Confidence Intervals for subsequent assessments)

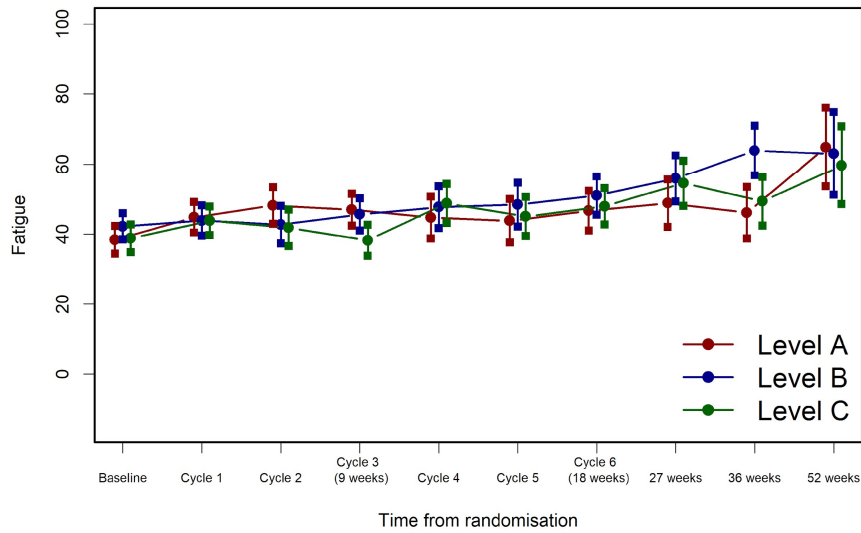

**eFigure 9: EuroqoL EQ-5D-3L Score in the CHEMO-INTENSITY pathway**  
 (mean and 95% Confidence Intervals for baseline, adjusted mean and 95% Confidence Intervals for subsequent assessments)

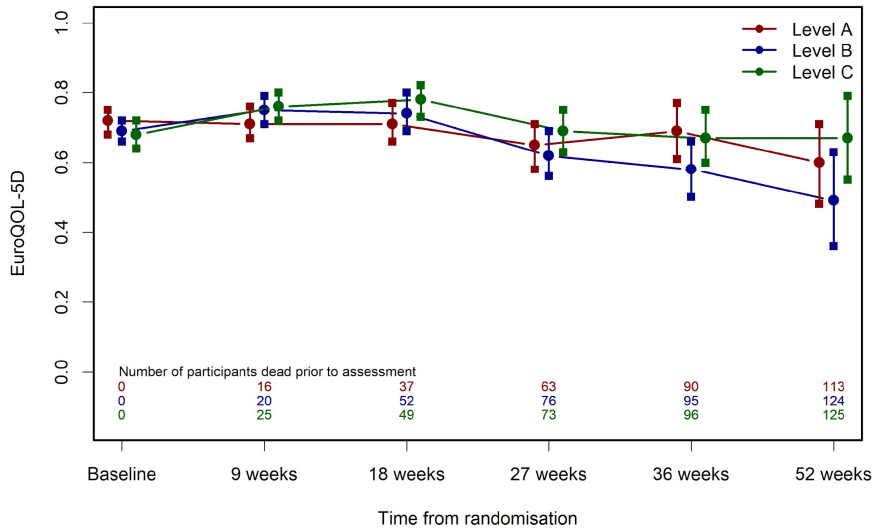



**eFigure 10: EORTC-QLQ-C30 Fatigue scale in the CHEMO-BSC pathway**  
 (mean and 95% Confidence Intervals for baseline, adjusted mean and 95% Confidence Intervals for subsequent assessments)

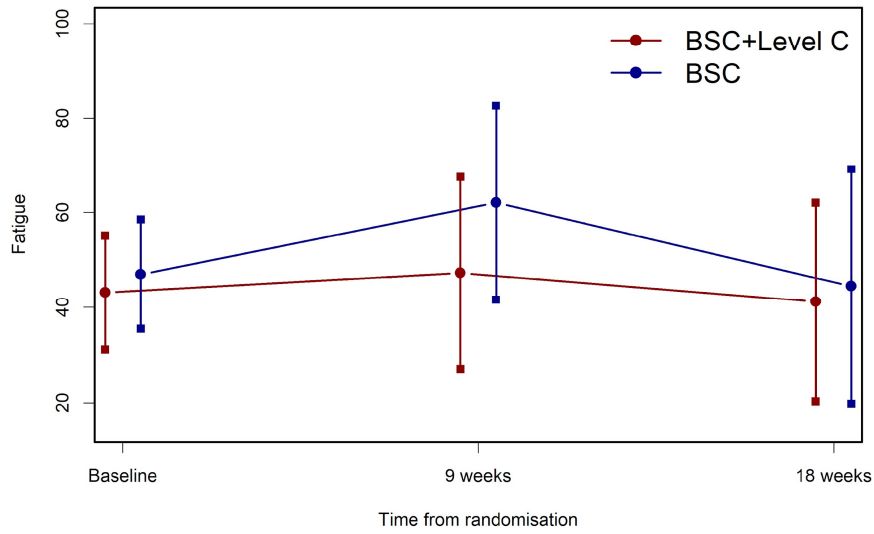

**eFigure 11: EuroqoL EQ-5D-3L Score in the CHEMO-BSC pathway**  
 (mean and 95% Confidence Intervals for baseline, adjusted mean and 95% Confidence Intervals for subsequent assessments)

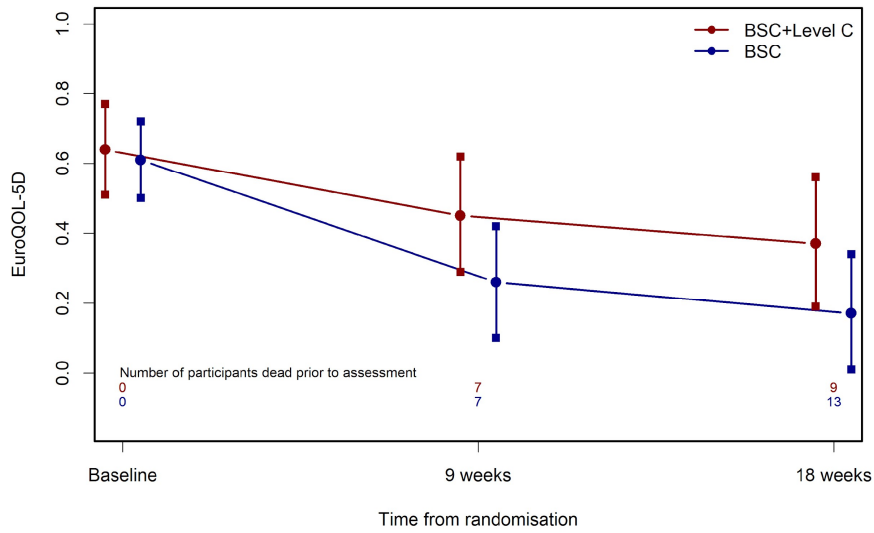

**eFigure 12: Time to Deterioration of Fatigue in the CHEMO-INTENSITY Pathway**

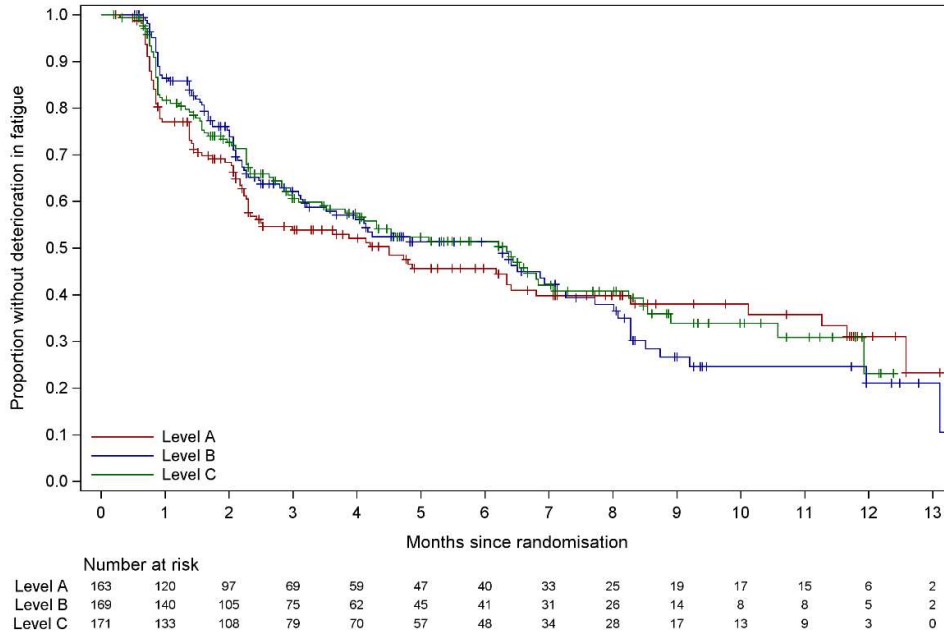

**eFigure 13: Per Protocol Population: PFS curves by randomised treatment arm**

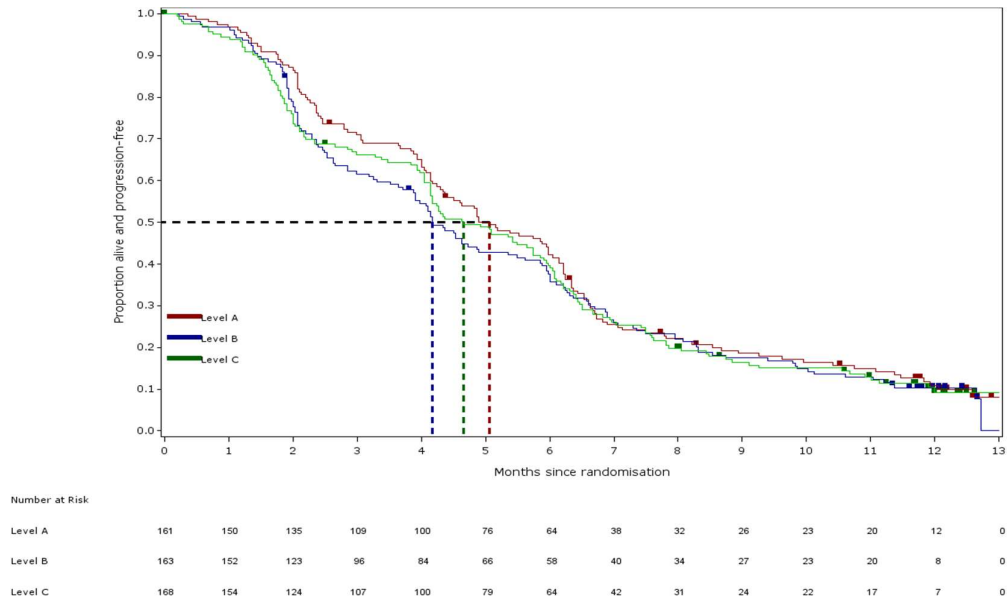

Supplement: jamaoncol-e210848-s003.pdf [file jamaoncol-e210848-s003.pdf]
