# Supplementary material for: Efficacy of Reduced-Intensity Chemotherapy With Oxaliplatin and Capecitabine on Quality of Life and Cancer Control Among Older and Frail Patients With Advanced Gastroesophageal Cancer: The GO2 Phase 3 Randomized Clinical Trial
Source: PubMed Central journal article supplement (PMC8120440; doi:10.1001/jamaoncol.2021.0848), 2021-05-13
Supplement: jamaoncol-e210848-s004.pdf [file jamaoncol-e210848-s004.pdf]

\*Indicates required information. Only first name, last name, and suffix will appear in PubMed.

| Group Name(s):* The GO2 Trial Investigators |             |                       |                  |                                                                       |                                          |                                                         |                                                                                            |
|---------------------------------------------|-------------|-----------------------|------------------|-----------------------------------------------------------------------|------------------------------------------|---------------------------------------------------------|--------------------------------------------------------------------------------------------|
| First Name and Middle Initial(s)*           | Last Name*  | Suffix (eg, Jr, III)* | Academic Degrees | Institution                                                           | Location (city, state/province, country) | Role or Contribution, eg, chair, principal investigator | Group (if more than 1 Group listed in the byline) and/or Subgroup (eg, Steering Committee) |
| Eleanor                                     | James       |                       |                  | Sherwood Forest NHS Foundation Trust                                  | Nottingham, UK                           | Recruiting Centre PI                                    |                                                                                            |
| Sue                                         | Cheeseman   |                       |                  | Bradford Teaching Hospitals NHS Foundation Trust                      | Bradford, UK                             | Recruiting Centre PI                                    |                                                                                            |
| Tom                                         | Roques      |                       |                  | Norfolk and Norwich University Hospitals NHS Foundation Trust         | Norwich, UK                              | Recruiting Centre PI                                    |                                                                                            |
| Nick                                        | Reed        |                       |                  | Imperial College Healthcare NHS Trust                                 | London, UK                               | Recruiting Centre PI                                    |                                                                                            |
| Charles                                     | Candish     |                       |                  | Gloucestershire Hospitals NHS Foundation Tru                          | Gloucester, UK                           | Recruiting Centre PI                                    |                                                                                            |
| David                                       | Fyfe        |                       |                  | University Hospitals of Morecambe Bay NHS Foundation Trust            | Lancaster, UK                            | Recruiting Centre PI                                    |                                                                                            |
| Kim                                         | Last        |                       |                  | York Teaching Hospitals Foundation Trust                              | York, UK                                 | Recruiting Centre PI                                    |                                                                                            |
| Richard                                     | Ellis       |                       |                  | Royal Cornwall NHS Trust                                              | Truro, UK                                | Recruiting Centre PI                                    |                                                                                            |
| Lesley                                      | Samuel      |                       |                  | NHS Grampian, Aberdeen                                                | Aberdeen, UK                             | Recruiting Centre PI                                    |                                                                                            |
| Rebecca                                     | Herbertson  |                       |                  | Western Sussex Hospitals NHS Foundation Trust                         | Brighton, UK                             | Recruiting Centre PI                                    |                                                                                            |
| Louise                                      | Medley      |                       |                  | South Devon Healthcare NHS Trust,                                     | Torbay, UK                               | Recruiting Centre PI                                    |                                                                                            |
| Kinnari                                     | Patel       |                       |                  | Oxford University Hospitals NHS Trust,                                | Oxford, UK                               | Recruiting Centre PI                                    |                                                                                            |
| David                                       | Sherriff    |                       |                  | Plymouth Hospitals NHS Trust                                          | Plymouth, UK                             | Recruiting Centre PI                                    |                                                                                            |
| Angus                                       | Robinson    |                       |                  | East Sussex Healthcare NHS Trust                                      | Brighton, UK                             | Recruiting Centre PI                                    |                                                                                            |
| Pavel                                       | Bezecny     |                       |                  | Blackpool Teaching Hospitals NHS Trust                                | Preston, UK                              | Recruiting Centre PI                                    |                                                                                            |
| Dunca                                       | Wilkins     |                       |                  | Betsi Cadwaldr University LHB                                         | Clwyd, UK                                | Recruiting Centre PI                                    |                                                                                            |
| Adam                                        | McGeoch     |                       |                  | Hinchingbrooke Healthcare NHS Trust                                   | Huntingdon, UK                           | Recruiting Centre PI                                    |                                                                                            |
| Daniel                                      | Propper     |                       |                  | Barts Cancer Institute                                                | London, UK                               | Recruiting Centre PI                                    |                                                                                            |
| Olwyn                                       | Williams    |                       |                  | Ysbyty Gwynedd                                                        | Bangor, UK                               | Recruiting Centre PI                                    |                                                                                            |
| Serena                                      | Hilman      |                       |                  | Western Area Healthcare Trust,                                        | Bristol, UK                              | Recruiting Centre PI                                    |                                                                                            |
| Sherif                                      | Raouf       |                       |                  | Barking, Havering & Redbridge University Hospitals NHS Trust          | London, UK                               | Recruiting Centre PI                                    |                                                                                            |
| Claire                                      | Hobbs       |                       |                  | Great Western Hospitals NHS Foundation Trust                          | Swindon, UK                              | Recruiting Centre PI                                    |                                                                                            |
| Jo                                          | Parkinson   |                       |                  | The Royal Bournemouth and Christchurch Hospitals NHS Foundation Trust | Bournemouth, UK                          | Recruiting Centre PI                                    |                                                                                            |
| Nick                                        | Wadd        |                       |                  | South Tees Hospitals NHS Foundation Trust                             | Middlesborough, UK                       | Recruiting Centre PI                                    |                                                                                            |
| W                                           | Saku        |                       |                  | Milton Keynes Hospital NHS Trust                                      | Milton Keynes, UK                        | Recruiting Centre PI                                    |                                                                                            |
| Victori                                     | Kunene      |                       |                  | Walsall Healthcare NHS Trust                                          | Birmingham, UK                           | Recruiting Centre PI                                    |                                                                                            |
| Colin                                       | Askill      |                       |                  | Abertawe Bro Morgannwg NHS Trust                                      | Swansea, UK                              | Recruiting Centre PI                                    |                                                                                            |
| Arshad                                      | Jamil       |                       |                  | Mid Cheshire Hospitals Foundation Trust                               | Crewe, UK                                | Recruiting Centre PI                                    |                                                                                            |
| Emma                                        | Cattell     |                       |                  | Taunton and Somerset NHS Foundation Trust                             | Taunton, UK                              | Recruiting Centre PI                                    |                                                                                            |
| Lauren                                      | Gorf        |                       |                  | Dorset Country Hospitals NHS Foundation Trust                         | Dorset, UK                               | Recruiting Centre PI                                    |                                                                                            |
| Vallipuram                                  | Vigneswaran |                       |                  | Singleton Hospital, Hywel Dda Health Board                            | Swansea, UK                              | Recruiting Centre PI                                    |                                                                                            |
| Erica                                       | Beaumont    |                       |                  | Yeovil District Hospital NHS Foundation Trust                         | Yeovil, UK                               | Recruiting Centre PI                                    |                                                                                            |
| Syed                                        | Zubair      |                       |                  | County Durham and Darlington NHS Foundation Trust                     | Darlington, UK                           | Recruiting Centre PI                                    |                                                                                            |
| Elin                                        | Jones       |                       |                  | Hywel Dda Health Board                                                | Haverfordwest, UK                        | Recruiting Centre PI                                    |                                                                                            |
| Nicholas                                    | Reed        |                       |                  | Wye Valley NHS Trust                                                  | Cheltenham, UK                           | Recruiting Centre PI                                    |                                                                                            |
| Alaaeldin                                   | Shablak     |                       |                  | Salisbury NHS Foundation Trust                                        | Salisbury, UK                            | Recruiting Centre PI                                    |                                                                                            |
| George                                      | Bozas       |                       |                  | Northern Lincolnshire and Goole NHS Foundation Trust                  | Hull, UK                                 | Recruiting Centre PI                                    |                                                                                            |
| Sheela                                      | Rao         |                       |                  | Royal Marsden NHS Trust                                               | London, UK                               | Recruiting Centre PI                                    |                                                                                            |
| Michael                                     | Bennet      |                       |                  | University of Leeds, Institute of Health Sciences                     | Leeds, UK                                | TMG Member                                              |                                                                                            |
| Joanne                                      | Askey       |                       |                  | Leeds Teaching Hospitals NHS Trust                                    | Leeds, UK                                | TMG Member                                              |                                                                                            |

## Supplemental Online Content: Nonauthor Collaborators

\*Indicates required information. Only first name, last name, and suffix will appear in PubMed.

| First Name and Middle Initial(s)* | Last Name* | Suffix (eg, Jr, III)* | Academic Degrees | Institution                                              | Location (city, state/province, country) | Role or Contribution, eg, chair, principal investigator | Group (if more than 1 Group listed in the byline) and/or Subgroup (eg, Steering Committee) |
|-----------------------------------|------------|-----------------------|------------------|----------------------------------------------------------|------------------------------------------|---------------------------------------------------------|--------------------------------------------------------------------------------------------|
| Gareth                            | Griffiths  |                       |                  | University of Southampton                                | Southampton, UK                          | Independent TSC Chair                                   |                                                                                            |
| Sally                             | Clive      |                       |                  | Edinburgh Cancer Centre                                  | Edinburgh, UK                            | Independent TSC member                                  |                                                                                            |
| Vanessa                           | Potter     |                       |                  | University Hospitals Coventry and Warwickshire NHS Trust | Coventry, UK                             | Independent TSC member                                  |                                                                                            |
| Jean                              | Gall       |                       |                  | n/a                                                      | n/a                                      | Independent TSC patient member                          |                                                                                            |
| Chris                             | Twelves    |                       |                  | Leeds Teaching Hospitals NHS Trust                       | Leeds, UK                                | IDMC Chair                                              |                                                                                            |
| Matt                              | Sydes      |                       |                  | MRC Clinical Trials Unit, University College             | London, UK                               | IDMC member                                             |                                                                                            |
| Juan                              | Valle      |                       |                  | University of Manchester                                 | Manchester, UK                           | IDMC member                                             |                                                                                            |
| Jo                                | Webster    |                       |                  | University of Leeds, Institute of Trials Research        | Leeds, UK                                | Clinical Trials Unit member                             |                                                                                            |
| Marc                              | Jones      |                       |                  | University of Leeds, Institute of Trials Research        | Leeds, UK                                | Clinical Trials Unit member                             |                                                                                            |
| Fiona                             | Collinson  |                       |                  | University of Leeds, Institute of Trials Research        | Leeds, UK                                | Clinical Trials Unit member                             |                                                                                            |
| Julia                             | Brown      |                       |                  | University of Leeds, Institute of Trials Research        | Leeds, UK                                | Clinical Trials Unit member                             |                                                                                            |
| Louise                            | Brook      |                       |                  | University of Leeds, Institute of Trials Research        | Leeds, UK                                | Clinical Trials Unit member                             |                                                                                            |
