# Supplementary material for: Efficacy of Reduced-Intensity Chemotherapy With Oxaliplatin and Capecitabine on Quality of Life and Cancer Control Among Older and Frail Patients With Advanced Gastroesophageal Cancer: The GO2 Phase 3 Randomized Clinical Trial
Source: PubMed Central journal article supplement (PMC8120440; doi:10.1001/jamaoncol.2021.0848), 2021-05-13
Supplement: jamaoncol-e210848-s005.pdf [file jamaoncol-e210848-s005.pdf]

## Data Sharing Statement

Hall. Efficacy of Reduced-Intensity Chemotherapy With Oxaliplatin and Capecitabine on Quality of Life and Cancer Control Among Older and Frail Patients With Advanced Gastroesophageal Cancer. *JAMA Oncol.* Published May 13, 2021. doi:10.1001/jamaoncol.2021.0848

### Data

**Data available:** Yes

**Data types:** Deidentified participant data, Data dictionary

**How to access data:** <https://ctru.leeds.ac.uk/>

**When available:** With publication

### Supporting Documents

**Document types:** None

### Additional Information

**Who can access the data:** Researchers approved by the Trial Management Group

**Types of analyses:** Research

**Mechanisms of data availability:** after approval of a proposal
